# Supplementary material for: Acute and long-term clinical, neuropsychological and return-to-work sequelae following electrical injury: a retrospective cohort study
Source: PubMed Central journal article supplement — BMJ Open. 2019 May 14;9(5):e025990. doi: 10.1136/bmjopen-2018-025990 (PMC6530314; doi:10.1136/bmjopen-2018-025990), 2019-05-14
Supplement: bmjopen-2018-025990.draft_revisions.pdf [file bmjopen-2018-025990.draft_revisions.pdf]

# BMJ Open

BMJ Open is committed to open peer review. As part of this commitment we make the peer review history of every article we publish publicly available.

When an article is published we post the peer reviewers' comments and the authors' responses online. We also post the versions of the paper that were used during peer review. These are the versions that the peer review comments apply to.

The versions of the paper that follow are the versions that were submitted during the peer review process. They are not the versions of record or the final published versions. They should not be cited or distributed as the published version of this manuscript.

BMJ Open is an open access journal and the full, final, typeset and author-corrected version of record of the manuscript is available on our site with no access controls, subscription charges or pay-per-view fees (<http://bmjopen.bmj.com>).

If you have any questions on BMJ Open's open peer review process please email [info.bmjopen@bmj.com](mailto:info.bmjopen@bmj.com)

# BMJ Open

## Acute and long-term clinical, neuropsychological, and return-to-work sequelae following electrical injury: a retrospective cohort study

|                               |                                                                                                                                                                                                                                                                                                                           |
|-------------------------------|---------------------------------------------------------------------------------------------------------------------------------------------------------------------------------------------------------------------------------------------------------------------------------------------------------------------------|
| Journal:                      | <i>BMJ Open</i>                                                                                                                                                                                                                                                                                                           |
| Manuscript ID                 | bmjopen-2018-025990                                                                                                                                                                                                                                                                                                       |
| Article Type:                 | Research                                                                                                                                                                                                                                                                                                                  |
| Date Submitted by the Author: | 12-Aug-2018                                                                                                                                                                                                                                                                                                               |
| Complete List of Authors:     | Radulovic, Nada; Queen's University School of Medicine, Mason, Stephanie; Sunnybrook Health Sciences Centre, Ross Tilley Burn Centre<br>Rehou, Sarah; Sunnybrook Research Institute<br>Godleski, Matthew; St. John's Rehabilitation Hospital<br>Jeschke, Marc; Sunnybrook Health Sciences Centre, Ross Tilley Burn Centre |
| Keywords:                     | Electrical Injuries, Burns, Rehabilitation                                                                                                                                                                                                                                                                                |
|                               |                                                                                                                                                                                                                                                                                                                           |

SCHOLARONE™  
Manuscripts

View Only

August 11<sup>th</sup>, 2018

Editor-in-Chief  
Mr. Adrian Aldcroft  
*BMJ Open*

Dear Mr. Aldcroft,

We are pleased to submit an original research article entitled “*Acute and long-term clinical, neuropsychological, and return-to-work sequelae following electrical injury: a retrospective cohort study*” for consideration for publication.

In this manuscript, we have characterized the multifaceted effects following electrical injury, that extend beyond the acute management period. Specifically, we have shown that both low- and high-voltage injuries are implicated in extensive, and adverse, neuropsychological and return-to-work sequelae. Currently, there is limited literature that has evaluated the social and mental health impacts of this type of burn injury. As such, our study is the first complete investigation of acute and long-term adverse effects in combination, within this complex patient population.

We believe that this manuscript would be an appropriate addition to BMJ Open because it aligns with several aims of this journal. Specifically, this study and its findings are of global relevance, as electrical injuries occur worldwide, across both developed and developing nations. By defining the clinical and psychosocial consequences of this injury, we aim to provide caregivers with a greater understanding of the barriers that these patients may face immediately following injury and throughout rehabilitation. Our hope is that these findings may contribute to enhanced monitoring, with subsequent diagnosis and earlier intervention.

We confirm that all authors have made substantial contributions to this article. This manuscript, including related data, figures and tables, has not been previously published and is not under consideration by any other journal.

Thank you for considering our manuscript.

Sincerely,



Marc Jeschke, MD PhD FACS FCCM FRCS(C)  
Professor, University of Toronto

1  
2  
3 Department of Surgery, Division of Plastic Surgery; Department of Immunology  
4 Director Ross Tilley Burn Centre, Sunnybrook Health Sciences Centre  
5 Chair in Burn Research  
6 Senior Scientist, Sunnybrook Research Institute  
7 (T) 416-480-6703; (F) 416-480-6763;  
8 Email: marc.jeschke@sunnybrook.ca  
9  
10  
11  
12  
13  
14  
15  
16  
17  
18  
19  
20  
21  
22  
23  
24  
25  
26  
27  
28  
29  
30  
31  
32  
33  
34  
35  
36  
37  
38  
39  
40  
41  
42  
43  
44  
45  
46  
47  
48  
49  
50  
51  
52  
53  
54  
55  
56  
57  
58  
59  
60

For peer review only

1  
2  
3 **Acute and long-term clinical, neuropsychological, and return-to-work sequelae following electrical**  
4  
5 **injury: a retrospective cohort study**  
6  
7

8  
9 Nada Radulovic BSc<sup>1,2</sup>, Stephanie A. Mason MD PhD<sup>1,3</sup>, Sarah Rehou MS<sup>1</sup>, Matthew Godleski MD<sup>4,5</sup>,  
10  
11 Marc G. Jeschke MD PhD FACS FCCM FRCS(C)<sup>1,6,7</sup>  
12  
13

14  
15  
16 <sup>1</sup> Ross Tilley Burn Centre, Sunnybrook Health Sciences Centre, Toronto, Ontario, Canada

17  
18 <sup>2</sup> School of Medicine, Queen's University, Kingston, Ontario, Canada

19  
20 <sup>3</sup> Division of General Surgery, Department of Surgery, Faculty of Medicine, University of Toronto,  
21  
22 Toronto, Ontario, Canada

23  
24 <sup>4</sup> St. John's Rehabilitation Hospital, Toronto, Ontario, Canada

25  
26 <sup>5</sup> Division of Physical Medicine and Rehabilitation, Department of Medicine, Faculty of Medicine,  
27  
28 University of Toronto, Toronto, Ontario, Canada

29  
30 <sup>6</sup> Division of Plastic and Reconstructive Surgery, Department of Surgery, Faculty of Medicine, University  
31  
32 of Toronto, Toronto, Ontario, Canada

33  
34  
35 <sup>7</sup> Department of Immunology, Faculty of Medicine, University of Toronto, Toronto, Ontario, Canada  
36  
37

38  
39 **Corresponding author and person to whom reprint request should be addressed:**

40  
41 Marc Jeschke, MD PhD FACS FCCM FRCS(C)

42  
43 Professor - University of Toronto

44  
45 Department of Surgery, Division of Plastic Surgery, Department of Immunology

46  
47 Director Ross Tilley Burn Centre - Sunnybrook Health Sciences Centre

48  
49 Rm D704, 2075 Bayview Ave. Toronto, ON M4N 3M5, Canada

50  
51 Tel: 416-480-6703, Fax: 416-480-6763

52  
53 email: marc.jeschke@sunnybrook.ca

54  
55 **Manuscript word count: 3,088 (max. 4,000)**  
56  
57

## ABSTRACT

**Objective:** To determine acute and long-term clinical, neuropsychological, and return-to-work (RTW) effects of electrical injuries (EIs). This study aims to further contrast sequelae between low- and high-voltage injuries (LVIs, HVIs). We hypothesize that all EIs will result in substantial adverse effects during both phases of management, with HVIs contributing to greater rates of sequelae.

**Design:** Retrospective cohort study evaluating EI admissions between 1998-2015.

**Setting:** Provincial burn centre and rehabilitation hospital specializing in EI management.

**Participants:** All EI admissions were reviewed for acute clinical outcomes (n=207).

Rehabilitation patients, who were referred from the burn centre (n=63) or other burn units across the province (n=65), were screened for inclusion. Six patients were excluded due to pre-existing psychiatric conditions. This cohort (n=122) was assessed for long-term outcomes. Median time to first and last follow-up was 201(IQR 68-766) and 980(IQR 391-1409) days, respectively.

**Outcome measures:** Acute and long-term clinical, neuropsychological, and RTW sequelae.

**Results:** Acute clinical complications included infections (14%) and amputations (13%). HVIs resulted in greater rates of these complications, including compartment syndrome (16% vs. 4%,  $P=.007$ ) and rhabdomyolysis (12% vs. 0%,  $P<.001$ ). Rates of acute neuropsychological sequelae were similar between voltage groups. Long-term outcomes were dominated by insomnia (68%), anxiety (62%), PTSD (33%) and MDD (25%). Sleep difficulties (67%) were common following HVIs, while the LVI group most frequently experienced sleep difficulties (70%) and anxiety (70%). Ninety work-related EIs were available for RTW analysis. Sixty-one percent returned to their pre-injury employment and 19% were unable to return to any form of work. RTW outcomes were similar between voltage groups.

1  
2  
3 **Conclusions:** This is the first investigation to determine acute and long-term patient outcomes  
4  
5 post-EI. Findings highlight substantial rates of neuropsychological and social sequelae,  
6  
7 regardless of voltage. Therefore, specialized physical and psychosocial rehabilitation, both  
8  
9 acutely and long-term, are indicated.  
10  
11

12 **Keywords:** Electrical Injuries, Burns, Rehabilitation  
13

14 **Word count:** 300 (max. 300)  
15  
16  
17  
18  
19  
20  
21  
22  
23  
24  
25  
26  
27  
28  
29  
30  
31  
32  
33  
34  
35  
36  
37  
38  
39  
40  
41  
42  
43  
44  
45  
46  
47  
48  
49  
50  
51  
52  
53  
54  
55  
56  
57  
58  
59  
60

For peer review only

## ARTICLE SUMMARY

### Strengths and limitations of this study

- Our study evaluated broad sequelae, including clinical, neuropsychological and return-to-work parameters during acute and long-term intervals, which have not been collectively investigated for electrical injuries in prior studies.
- Outcome measures included a comprehensive list of neuropsychological symptoms and diagnoses that have not been contrasted between voltage groups in existing literature.
- Due to the longitudinal nature of our outcomes of interest, and the associated loss to follow-up, our findings may underrepresent the long-term neuropsychosocial sequelae within our study cohorts.



## INTRODUCTION

Electrical injuries (EIs) account for approximately 5% of all annual burn admissions in North America, yet are a leading cause of occupational burns worldwide.[1] These injuries result in substantial limitations that impede return to work (RTW) and decrease quality of life.[2-5] Several studies globally have proposed that EIs result in persistent functional, cognitive and neuropsychological sequelae including flashbacks, depression, anxiety and post-traumatic stress disorder.[3,5,6-16] However, clinical evidence regarding such effects is limited, as the majority of reported findings are case reports or small clinical studies.

Additionally, uncertainty with EI classification remains. EIs can be classified in various ways and defined as either high or low voltage. Currently, an EI below 1000 volts is considered a low voltage injury (LVI), whereas one of 1000 volts or greater is considered a high voltage injury (HVI). Clear classification is necessary as LVIs and HVIs have been suggested to result in different clinical courses. For example, a recent review found that HVIs experience longer hospital stays and greater rates of complications relative to LVIs.[17] Differences between these EI subgroups during the acute and long-term phases of treatment are currently unknown. Within our provincial health care system, a large proportion of EI survivors are treated at a single acute care surgical site, the *Ross Tilley Burn Centre (RTBC)* at *Sunnybrook Health Sciences Centre (SHSC)*. Typically, patients requiring ongoing inpatient or outpatient rehabilitation services are managed at *St. John's Rehabilitation Hospital (SJRH)*, which additionally serves as a referral site for other acute care centres and the workplace injury insurance system. Fewer sites allow for the centralization of services and collection of information for an uncommon diagnosis across multiple phases of care.

1  
2  
3           There are two primary objectives to this study. First, we aim to determine the effects of  
4  
5           EIs on the clinical course of acute hospitalization and long-term outcomes during rehabilitation.  
6  
7           The second objective is to examine and contrast individual short- and long-term outcomes by  
8  
9           voltage (HVI vs. LVI). We hypothesize that EIs result in substantial morbidity during acute  
10  
11           hospitalization and are associated with significant impairments in rehabilitation, RTW and  
12  
13           neuropsychology. Lastly, we expect HVIs to be implicated in more adverse clinical sequelae,  
14  
15           longer rehabilitation phases and poorer long-term outcomes.  
16  
17  
18  
19  
20  
21  
22  
23  
24  
25  
26  
27  
28  
29  
30  
31  
32  
33  
34  
35  
36  
37  
38  
39  
40  
41  
42  
43  
44  
45  
46  
47  
48  
49  
50  
51  
52  
53  
54  
55  
56  
57  
58  
59  
60

## MATERIALS AND METHODS

### Study design

We conducted a cohort study of all EI patients admitted to *RTBC* and *SJRH* between November 1998 and December 2015. This study was approved by the Research Ethics Board of *SHSC* (#075-2015). Patients were defined as HVI ( $\geq 1000$  V) or LVI ( $< 1000$  V) group based on the voltage documented at the time of acute admission at *RTBC* or from existing records at the time of entering rehabilitation care at *SJRH*.

We defined EI sequelae during two phases of treatment: (1) acutely, defined as the initial hospital admission at *RTBC*, and (2) long-term, defined as the period of inpatient and outpatient rehabilitation at *SJRH*. The long-term cohort included both patients treated at *RTBC* and those referred from other acute care centres. Patients with pre-existing psychiatric diagnoses, as identified in the admissions note from *RTBC* or *SJRH* patient records, were excluded from analysis of neuropsychological and RTW sequelae. Substance misuse was not included in our exclusion criteria (online supplementary figure 1).

### Acute period outcomes

Injury, demographic and clinical outcomes data were obtained through retrospective chart review of *RTBC* progress and summary notes. Variables collected included mean age, sex, mean percentage of the total body surface area (%TBSA), presence of inhalation injury, work-related nature of the injury, voltage (HVI vs. LVI) and EI type (flash, contact, both contact and flash, lightning or unspecified).

Clinical outcomes during the acute period that were collected included length of stay adjusted for %TBSA (LOS/%TBSA), number of amputations, amputation levels and number of operations. Incidence of mortality, rhabdomyolysis, compartment syndrome, one or more

1  
2  
3 infections, sepsis, multiple organ failure, and rehabilitation requirements (inpatient or outpatient)  
4  
5 were additionally analyzed.  
6

7  
8 Patients transferred to *SJRH* for rehabilitation underwent neuropsychological screening  
9  
10 prior to discharge, as part of the required referral documentation. This screen included:  
11  
12 depressed mood, anxiety, flashbacks, avoidance, hypervigilance, hyperarousal, nightmares, sleep  
13  
14 difficulties, social withdrawal, suicidal ideations, memory and concentration difficulties,  
15  
16 dizziness, headaches and phantom limb pain.  
17  
18

### 19 **Long-term period outcomes**

20  
21 Injury, demographic and neuropsychological outcomes data for patients in the long-term  
22  
23 cohort were obtained through chart review of *SJRH* documentation. Variables collected included  
24  
25 voltage (HVI vs. LVI), work-related nature of the EI and occupation. Long-term  
26  
27 neuropsychological outcomes identified from rehabilitation records were rates of depressed  
28  
29 mood, anxiety, flashbacks, avoidance, hypervigilance, hyperarousal, nightmares, sleep  
30  
31 difficulties, social withdrawal, suicidal ideations, memory and concentration difficulties,  
32  
33 dizziness, headaches, phantom limb pain and chronic pain. Treatment by a psychologist or  
34  
35 psychiatrist and the need for medication to address these sequelae were also recorded.  
36  
37  
38 Additionally, we recorded formal diagnoses of post-traumatic stress disorder (PTSD), major  
39  
40 depressive disorder (MDD), generalized anxiety disorder (GAD), adjustment disorder and panic  
41  
42 disorder, as well as the time to diagnosis post-injury.  
43  
44  
45

46  
47 Patients with work-related EIs had information recorded regarding RTW goals: time  
48  
49 required to return to pre-injury employment or alternative work in the labour market and the  
50  
51 form of required workplace accommodations (i.e. modified scheduling or duties). Patients who  
52  
53 did not have documented outcomes regarding their RTW status were excluded from this analysis.  
54  
55  
56  
57  
58  
59  
60

### Statistical analysis

Statistical analyses were performed using SPSS Statistics version 25.0 (IBM Corp.).

Categorical variables are presented as percentages, with group comparisons made using Pearson's  $\chi^2$  test and Fisher's exact test. Normally-distributed continuous variables are presented as mean and standard deviation (SD), and compared between groups using the student's t-test.

Nonparametric data are presented as median and interquartile range (IQR), and compared using the Mann-Whitney U test. For all comparisons,  $P \leq 0.05$  was considered statistically significant.

## RESULTS

### Acute period

We identified 207 acute EI admissions between 1998-2015 that were eligible for inclusion (online supplementary figure 2). Of these acute patients, 106 were discharged to either inpatient or outpatient rehabilitation at any rehabilitation facility and therefore had neuropsychiatric assessment data available for review. Four patients were excluded due to pre-existing psychiatric conditions that were documented on admission in their hospital records. *SJRH* records were obtained for 59 of these patients who were identified as having received inpatient or outpatient treatment at this facility without a pre-existing psychiatric condition. Health records for patients who were admitted to *SJRH* prior to the year 2003 were not accessible, therefore, these patients were not included in further analysis.

### Demographics

Patients were predominantly male with a mean age of  $41 \pm 13$  years. Mean burn size was  $8 \pm 12\%$  TBSA and the incidence of inhalation injury was low. LVIs were more common than HVIs (59% vs. 37%). The most prevalent mechanism of EI was isolated flash injury, followed by direct contact with electrical current. The majority of injuries were work-related (83%; online supplementary table 1).

### Clinical outcomes

The average LOS/%TBSA was  $4.5 \pm 9.5$  days/% burn, with 2% of patients not surviving to discharge (Table 1, online supplementary figure 3). The most common complications during acute management were infection, amputation and compartment syndrome. Multiple organ failure occurred in 1% of patients. While 13% of patients required at least one amputation, 6% required multiple. The most common amputation sites were the digits of the feet and the digits of

the hands (36% and 29%, respectively), while the least common was above the elbow (2%).

Overall, half of all EI patients required rehabilitation on discharge; of these, 32% and 68% were referred to inpatient and outpatient rehabilitation, respectively (Table 1).

**Table 1. Clinical outcomes during the acute phase of management.**

|                                                  | All Patients <sup>a</sup> | HVI        | LVI       | P     |
|--------------------------------------------------|---------------------------|------------|-----------|-------|
| No. of patients                                  | 207                       | 76         | 122       |       |
| LOS/TBSA, days/%, mean (SD)                      | 4.5 (9.5)                 | 8.0 (14.4) | 2.6 (4.0) | .007  |
| No. of ORs, median (IQR)                         | 1 (0-2)                   | 2 (0-3)    | 0 (0-1)   | <.001 |
| Complications, no. (%)                           |                           |            |           |       |
| Rhabdomyolysis                                   | 9 (4)                     | 9 (12)     | 0 (0)     | <.001 |
| Compartment syndrome                             | 17 (8)                    | 12 (16)    | 5 (4)     | .007  |
| Infection                                        | 28 (14)                   | 15 (20)    | 11 (9)    | .05   |
| Sepsis                                           | 11 (5)                    | 8 (11)     | 3 (3)     | .02   |
| Multiple organ failure                           | 1 (1)                     | 1 (1)      | 0 (0)     | .38   |
| Amputation                                       | 26 (13)                   | 21 (28)    | 3 (2)     | <.001 |
| Multiple amputations                             | 13 (6)                    | 10 (13)    | 2 (2)     | .001  |
| Requiring rehabilitation, no. (%)                | 106 (51)                  | 49 (65)    | 54 (44)   | .008  |
| Discharged to inpatient rehabilitation, no. (%)  | 34 (32)                   | 22 (45)    | 10 (19)   | <.001 |
| Discharged to outpatient rehabilitation, no. (%) | 72 (68)                   | 27 (55)    | 44 (82)   | >.99  |
| Mortality, no. (%)                               | 4 (2)                     | 3 (4)      | 1 (1)     | .16   |

Abbreviations: HVI, high-voltage injury; LVI, low-voltage injury; LOS, length of stay; TBSA, total body surface area.  
<sup>a</sup> Includes patients whose voltage was not otherwise specified (n=9).

### Neuropsychological outcomes

Of the 59 patients with neuropsychological screening, nearly one quarter experienced at least one neuropsychological symptom during the acute period (Table 2). The most common symptoms included flashbacks (15%), sleep difficulties (12%). Suicidal ideations, hyperarousal and social withdrawal did not occur during the acute phase of treatment (Figure 1).

**Table 2. Neuropsychological sequelae and management.**

|                                                  | All Patients <sup>a</sup> | HVI             | LVI            | P     |
|--------------------------------------------------|---------------------------|-----------------|----------------|-------|
| <b>Acute Cohort</b>                              |                           |                 |                |       |
| No. of patients                                  | 59                        | 26              | 31             |       |
| Neuropsychological sequelae, no. (%)             | 14 (24)                   | 6 (23)          | 7 (23)         | >.99  |
| <b>Long-Term Cohort</b>                          |                           |                 |                |       |
| No. of patients                                  | 122                       | 51              | 69             |       |
| Days to first follow-up, median (IQR)            | 201 (68-766)              | 504 (179-1236)  | 124 (41-233)   | <.001 |
| Days to last follow-up, median (IQR)             | 980 (391-1409)            | 1099 (511-1651) | 773 (315-1218) | .02   |
| Neuropsychological sequelae, no. (%)             |                           |                 |                |       |
| <5 yrs. post-injury                              | 99 (81)                   | 42 (82)         | 56 (81)        | >.99  |
| >5 yrs. post-injury                              | 20 (16)                   | 13 (25)         | 7 (10)         | .05   |
| Psychological/<br>Psychiatric treatment, no. (%) | 78 (64)                   | 31 (61)         | 47 (68)        | .44   |
| Medication, no. (%)                              | 78 (64)                   | 30 (59)         | 47 (68)        | .34   |

Abbreviations: HVI, high-voltage injury; LVI, low-voltage injury.

Analysis excludes patients with documented pre-existing psychiatric conditions.

<sup>a</sup>Includes patients whose voltage was not otherwise specified (acute cohort, n=2; long-term cohort, n=2).

## Acute period, high- vs low-voltage injuries

### Demographics

The acute cohort was comprised of 76 HVI and 122 LVI patients, with both groups being predominantly male. Both voltage cohorts were similar in mean age, mean %TBSA and incidence of inhalation injury. LVIs were more likely of being occupational in nature ( $P=.03$ ).

HVIs were more frequently a result of combined flash and contact burn etiology, whereas LVIs were more commonly associated with isolated flash injuries ( $P<.001$  for both; online supplementary table 1).

### Clinical outcomes

The incidence and severity of clinical outcomes were overall worse in the HVI group.

HVI patients experienced a longer LOS/%TBSA ( $P=.007$ ) and greater incidences of



1  
2  
3 rhabdomyolysis ( $P<0.001$ ), compartment syndrome ( $P=.007$ ), infections ( $P=.05$ ), and sepsis  
4  
5 ( $P=.02$ ; Table 1). However, there was no statistical difference in survival between HVIs and LVI  
6  
7 (Table 1, online supplementary figure 3). Single and multiple amputations were more common  
8  
9 among HVI patients ( $P<.001$  and  $P=.001$ , respectively). The majority of HVI amputations  
10  
11 involved digits (29% hands, 36% feet). Lastly, patients with HVIs were more likely of being  
12  
13 discharged to inpatient rehabilitation than LVIs ( $P<.001$ ; Table 1).  
14  
15

### 16 Neuropsychological outcomes

17  
18  
19 Of those screened, HVIs were equally as likely of experiencing neuropsychological  
20  
21 sequelae during the acute treatment period ( $P>.99$ ; Table 2). The incidence of symptoms was  
22  
23 likewise similar between voltage groups. Marginally greater rates of the following symptoms  
24  
25 were exhibited by the HVI group when contrasted with the LVI group: depressed mood (4% vs.  
26  
27 3%,  $P>.99$ ), flashbacks (15% vs. 13%,  $P>.99$ ), dizziness (4% vs. 3%,  $P>.99$ ), nightmares (4%  
28  
29 vs. 3%,  $P>.99$ ), avoidance (4% vs. 0%,  $P=.46$ ), memory and concentration impairments (8% vs.  
30  
31 3%,  $P=.59$ ), headaches (4% vs. 0%,  $P=.46$ ) and phantom limb pain (8% vs. 0%,  $P=.20$ ). In  
32  
33 contrast, LVIs were associated with slightly greater rates of sleep difficulties (13% vs. 8%,  
34  
35  $P=.68$ ), anxiety (6% vs. 4%,  $P>.99$ ) and hypervigilance (3% vs. 0%,  $P>.99$ ; Figure 1).  
36  
37  
38  
39

### 40 **Long-term period**

#### 41 Demographics

42  
43  
44 The long-term period cohort consisted of 128 patients, with a second screen identifying  
45  
46 six patients meeting exclusion criteria due to pre-existing psychiatric conditions. Therefore, 122  
47  
48 patients were available for analysis. Half of these patients had been treated for their acute injury  
49  
50 at *RTBC*. Acute data were available for those patients. The majority of patients in the long-term  
51  
52 cohort suffered EIs that were occupational in nature (91%, online supplementary table 2).  
53  
54  
55  
56  
57  
58  
59  
60

## Neuropsychological outcomes

More than half of all patients receiving rehabilitation were diagnosed with at least one psychiatric disorder after their injury, while one third of patients were diagnosed with two or more. The median time to a psychiatric diagnosis across all six conditions was 315 days (IQR 117-957) (online supplementary table 3). PTSD (33%), MDD (25%) and adjustment disorder (20%) were the psychiatric conditions that occurred most frequently (online supplementary figure 4). Of the vast majority of patients, 81% experienced at least one neuropsychological symptom between a median time to first and last follow-up of 201 (IQR 68-766) and 980 (IQR 391-1409) days post-injury, respectively (Table 2). The most common symptoms were sleep difficulties (68%), anxiety (62%), depressed mood (60%) and memory and concentration impairments (59%) (Figure 2). In more than 60% of patients, these were severe enough to require psychological/psychiatric treatment or medication. Patients with PTSD most commonly exhibited symptoms of anxiety, sleep difficulties and depressed mood (95%, 93% and 85%, respectively). MDD, GAD and adjustment disorder were frequently associated with symptoms of depressed mood, anxiety, sleep difficulties and memory and concentration impairments (online supplementary table 4).

## Return-to-work outcomes

A total of 111 work-related EIs were reviewed; of these, data regarding RTW status were available for 90 patients. Electricians made up the predominant occupation group, followed by powerline technicians (online supplementary table 2). Sixty-one percent of patients were able to return to their pre-injury occupation, of which 60% required modified duties and 55% required modified scheduling. Furthermore, 19% of patients sustaining work-related EIs returned to alternative employment through labour market re-entry (LMR), with the median time for

returning to any work being 166 days (IQR 82-414). Overall, one fifth of EI patients were unable to return to any form of employment (Table 3).

**Table 3. Return-to-work characteristics of occupational EIs within the long-term cohort.**

|                                          | All Patients <sup>a</sup> | HVI           | LVI          | <i>P</i> |
|------------------------------------------|---------------------------|---------------|--------------|----------|
| No. of patients                          | 90                        | 39            | 49           |          |
| Return to pre-injury occupation, no. (%) | 55 (61)                   | 23 (59)       | 30 (61)      | >.99     |
| Modified Duties, no. (%)                 | 33 (60)                   | 15 (65)       | 17 (57)      | .58      |
| Modified Schedule, no. (%)               | 30 (55)                   | 11 (48)       | 17 (57)      | .59      |
| Labour Market Re-Entry, no. (%)          | 17 (19)                   | 9 (23)        | 8 (16)       | .80      |
| Time to RTW, days, median (IQR)          | 166 (82-414)              | 207 (102-548) | 124 (57-348) | .12      |
| Unable to RTW, no. (%)                   | 17 (19)                   | 6 (15)        | 11 (22)      | .43      |

Abbreviations: HVI, high-voltage injury; LVI, low-voltage injury; RTW, return-to-work.  
<sup>a</sup>Includes patients whose voltage was not otherwise specified (n=2).

### Long-term period, high- vs low-voltage injuries

#### Neuropsychological outcomes

The distribution of formal diagnoses of individual psychiatric disorders was comparable between HVIs and LVIs (online supplementary figure 4). PTSD and MDD were the most common in both HVI and LVI groups (24% vs. 41%,  $P=.054$  and 18% vs. 30%,  $P=.14$ , respectively), while panic disorder was the most infrequently diagnosed (0% and 1%,  $P>.99$ ). HVIs were most commonly associated with sleep difficulties (67%), memory and concentration impairment (57%), and chronic pain (57%), while LVIs were most commonly associated with sleep difficulties (70%) and anxiety (70%) (Figure 2). HVIs were more likely of exhibiting neuropsychological sequelae beyond 5 years post-injury ( $P=.05$ ; Table 2). Voltage groups did not differ in their rates of treatment and medication requirements for management of neuropsychological sequelae.

#### Return-to-work outcomes

1  
2  
3 LVI and HVI exhibited similar rates of return to pre-injury occupation. More than half  
4  
5 of these patients required workplace accommodation. HVI patients more frequently required  
6  
7 modified duties, while LVIs were more commonly associated with modified scheduling. The  
8  
9 requirement for LMR for alternative employment was similar between voltage groups, along  
10  
11 with the median time for RTW. A similar inability to return to any form of employment was  
12  
13 observed between voltage groups (Table 3).  
14  
15  
16  
17  
18  
19  
20  
21  
22  
23  
24  
25  
26  
27  
28  
29  
30  
31  
32  
33  
34  
35  
36  
37  
38  
39  
40  
41  
42  
43  
44  
45  
46  
47  
48  
49  
50  
51  
52  
53  
54  
55  
56  
57  
58  
59  
60

## DISCUSSION

Our study identifies and delineates common sequelae that extend beyond acute management. When stratifying by voltage, the acute clinical findings indicate greater rates of complications and operative interventions in the HVI group. Conversely, rates of neuropsychological symptoms increase overtime. While overall neuropsychological sequelae are statistically comparable between voltage groups, LVIs result in marginally greater rates of depressed mood, anxiety, nightmares, headaches and hypervigilance. They have similarly been associated with greater rates of PTSD, MDD, GAD, adjustment disorder and panic disorder. Lastly, both voltage groups are comparably implicated in RTW challenges. HVIs result in more frequent job accommodations and retraining, while LVIs are more commonly associated with unsuccessful RTW. Therefore, while HVIs result in increased clinical morbidity, LVIs need to be recognized as significant burdens for their effects on neuropsychological and social well-being.

Acute clinical findings are consistent with other studies that have shown increased morbidity in patients who have sustained a HVI.[17-21] A recent systematic review evaluated the different injury patterns associated with HVIs and LVIs. Combined data indicate that HVIs experience longer hospital stays and greater complications rates.[17] Comparative data between voltage groups for other common complications implicated in EIs, such as compartment syndrome, rhabdomyolysis and amputations, are lacking in literature.[22-24] However, histological and gross structural modifications, along with subsequent muscle and vasculature destruction, have been observed with increasing voltage. This further suggests that HVIs may result in increased complication rates, morbidity and mortality.[24-28]

Hussmann et al. observed greater rates of neurological impairments in their EI patient cohort, over a mean follow-up time of 5 years.[6] This suggests that our findings may

1  
2  
3 underestimate the true severity of EIs, as continued care beyond 5 years was uncommon in our  
4 long-term cohort. Nevertheless, our findings are consistent with other studies that have evaluated  
5 the implications of EIs on behaviour, cognition and executive function.[5,6,8-10,14-16,29]  
6  
7  
8  
9  
10 Common difficulties identified during recovery include flashbacks, nightmares, MDD and  
11  
12 PTSD. The findings of these studies highlight the need for further exploration of  
13  
14 neuropsychological sequelae in this burn population. In doing so, we will improve the  
15  
16 understanding of specific predispositions post-EI, facilitating symptom monitoring and  
17  
18 management.  
19  
20

21  
22 Current literature regarding neuropsychological sequelae suggests that burn survivors  
23  
24 exhibit greater rates of psychiatric illnesses compared to the general population. Meyer et al.  
25  
26 investigated the prevalence of diagnoses in young adults who had sustained a burn injury of any  
27  
28 etiology prior to the age of 16.[30] Relative to our EI cohort, a lower rate of PTSD and greater  
29  
30 incidences of MDD and GAD were reported. However, the mean follow-up time post-injury is  
31  
32 greater than that of our study, which may result in underestimation of diagnosis rates within our  
33  
34 cohort. Therefore, comparison of our findings to current evidence indicates that EI patients may  
35  
36 be more predisposed to certain psychiatric conditions relative to the general burn population.  
37  
38  
39

40  
41 Lastly, our results demonstrate the challenges that EIs elicit with employment  
42  
43 reintegration. Noble et al. found that a third of their EI cohort was unable to return to any  
44  
45 employment.[5] In contrast, we observed a lower inability to RTW in both voltage groups. This  
46  
47 may indicate improved strategies in EI management and more specialized rehabilitation  
48  
49 programs that enhance work reintegration. However, workplace accommodations remain  
50  
51 common amongst this burn population and should be an area of focus during rehabilitation.  
52  
53  
54  
55  
56  
57  
58  
59  
60

1  
2  
3 This study provides a regional view into the truly global burden of this burn injury. A  
4 recent review of adult EIs identified a total of 41 publications globally in this area of research,  
5 with 58% of studies originating from outside of North America. Nearly half of all studies  
6 originated from outside of North American and did not independently evaluate HVI and LVI  
7 outcomes. These studies limited investigations to clinical-based outcomes without addressing  
8 rehabilitation and psychological impacts.[17] Therefore, to our knowledge, our study is the most  
9 comprehensive acute and long-term investigation of EIs to date, providing caregivers with an in-  
10 depth understanding of the acute and long-term barriers faced by this burn population. These  
11 findings additionally highlight the need for employee safety education and post-injury  
12 monitoring for common sequelae with any voltage. Lastly, the formulation of holistic EI teams  
13 (i.e. occupational therapists, physiotherapists, pain specialists, RTW coordinators) may facilitate  
14 reintegration to original employment.  
15  
16  
17  
18  
19  
20  
21  
22  
23  
24  
25  
26  
27  
28  
29

30  
31 Several limitations have been recognized. Data from the acute period was extracted from  
32 a single regional burn centre. Therefore, our cohorts consist of patients believed to be more  
33 injured than other EI patients, requiring specialized treatment. Long-term data is limited to  
34 patients who received rehabilitation services at *SJRH*. Patients may have sought treatment within  
35 their community, limiting identification of more long-term sequelae. Due to this loss to follow-  
36 up, our results may underrepresent the long-term neuropsychological and RTW effects of EIs.  
37  
38  
39  
40  
41  
42  
43

44 In conclusion, EIs are implicated in multifaceted clinical, neuropsychological and social  
45 sequelae. Effects exist acutely and long-term, warranting monitoring that extends beyond initial  
46 treatment. LVIs are, at minimum, as likely as HVIs of exhibiting complications during recovery.  
47 Lastly, we have identified these effects as possible barriers for successful employment re-  
48 integration. Collectively, these findings indicate a need for focused training and rehabilitation.  
49  
50  
51  
52  
53  
54  
55  
56  
57  
58  
59  
60

1  
2  
3 Future investigations will involve implementing similar studies across broad geographic regions  
4  
5 to inform region-specific management of this burn injury.  
6  
7  
8  
9  
10  
11  
12  
13  
14  
15  
16  
17  
18  
19  
20  
21  
22  
23  
24  
25  
26  
27  
28  
29  
30  
31  
32  
33  
34  
35  
36  
37  
38  
39  
40  
41  
42  
43  
44  
45  
46  
47  
48  
49  
50  
51  
52  
53  
54  
55  
56  
57  
58  
59  
60

For peer review only



**ACKNOWLEDGEMENTS**

None.

**FUNDING STATEMENT**

This work is supported by grants from the National Institutes of Health (R01 GM087285-01); CIHR Funds (123336), CFI Leader's Opportunity Fund (Project #25407). Additionally, this work was generously supported by Alectra Inc., Electrical Safety Authority, Hydro One, Ontario Energy Network, Ontario Power Generation, Power Workers Union and Toronto Hydro.

**COMPETING INTERESTS STATEMENT**

None declared.

**AUTHOR CONTRIBUTIONS**

MGJ was responsible for the study design. NR was responsible for the literature search, data acquisition and drafting of the work. SR and NR conducted statistical analysis of data. NR, SAM, SR, MG and MGJ were responsible for revisions of the work. All authors gave approval for the final version of the manuscript.

**DATA SHARING STATEMENT**

No additional data from this study are available.

**REFERENCES**

1. American Burn Association. National Burn Repository: 2016 Report.  
<http://ameriburn.org/education/publications/> Published 2016. Accessed June, 2017.
2. Mancusi-Ungaro HR Jr, Tarbox AR, Wainwright DJ. Posttraumatic stress disorder in electric burn patients. *J Burn Care Rehabil.* 1986;7:521–525.
3. Inancsi W, Guidotti TL. Occupation-related burns: five-year experience of an urban burn center. *J Occup Med.* 1987;29(9):730-733.
4. Mandelcorn E, Gomez M, Cartotto RC. Work-related burn injuries in Ontario, Canada: has anything changed in the last 10 years? *Burns.* 2003;29(5):469-472.
5. Noble J, Gomez M, Fish JS. Quality of life and return to work following electrical burns. *Burns.* 2006;32(2):159-164.
6. Hussmann J, Kucan JO, Russell RC, et al. Electrical injuries—morbidity, outcome and treatment rationale. *Burns.* 1995;21:530–535.
7. Janus TJ, Barrash J. Neurologic and neurobehavioral effects of electric and lightning injuries. *J Burn Care Rehabil.* 1996;17:409–415.
8. Pliskin NH, Capelli-Schellpfeffer M, Law RT, et al. Neuropsychological symptom presentation after electrical injury. *J Trauma.* 1998;44:709–715.
9. Kelley KM, Tkachenko TA, Pliskin NH, et al. Life after electrical injury—risk factors for psychiatric sequelae. *Ann N Y Acad Sci.* 1999;888:356-363.
10. Pliskin NH, Fink JW, Malina A, et al. The neuropsychological effects of electrical injury: new insights. *Ann NY Acad Sci.* 1999;888:140–149.
11. Muehlberger T, Vogt PM, Munster AM. The long-term consequences of lightning injuries. *Burns.* 2001;27(8):829-833.

- 1  
2  
3 12. Martin TA, Salvatore NF, Johnstone B. Cognitive decline over time following electrical  
4  
5 injury. *Brain Inj.* 2003;17(9):817-823.  
6  
7
- 8 13. Pliskin NH, Ammar AN, Fink JW, et al. Neuropsychological changes following electrical  
9  
10 injury. *J Int Neuropsychol Soc.* 2006;12:17–23.  
11  
12
- 13 14. Ramati A, Rubin LH, Wicklund A, et al. Psychiatric morbidity following electrical injury  
14  
15 and its effects on cognitive functioning. *Gen Hosp Psychiatry.* 2009;31(4):360-366.  
16  
17
- 18 15. Chudasama S, Goverman J, Donaldson JH, et al. Does voltage predict return to work and  
19  
20 neuropsychiatric sequelae following electrical burn injury? *Ann Plast Surg.* 2010;64(5):522-  
21  
22 525.  
23
- 24 16. Piotrowski A, Fillet AM, Perez P, et al. Outcome of occupational electrical injuries among  
25  
26 French electric company workers: a retrospective report of 311 cases, 1996-2005. *Burns.*  
27  
28 2014;40(3):480-488.  
29  
30
- 31 17. Shih JG, Shahrokhi S, Jeschke MG. Review of Adult Electrical Burn Injury Outcomes  
32  
33 Worldwide: An Analysis of Low-Voltage vs. High Voltage Electrical Injury. *J Burn Care*  
34  
35 *Res.* 2017;38(1):e293-e298.  
36  
37
- 38 18. Grube BJ, Heimback DM, Engrav LH, et al. Neurologic consequences of electrical burns. *J*  
39  
40 *Trauma.* 1990;30(3):254-258.  
41  
42
- 43 19. Luz DP, Millan LS, Alessi MS et al. Electrical burns: a retrospective analysis across a 5-year  
44  
45 period. *Burns.* 2009;35(7):1015-1019.  
46  
47
- 48 20. Gündüz T, Elçioğlu O, Cetin C. Intensity and localization of trauma in non-fatal electrical  
49  
50 injuries. *Ulus Travma Acil Cerrahi Derg.* 2010;16(3):237-240.  
51
- 52 21. Karadas S, Gonullu H, Oncu MR, et al. The effects on complications and myopathy of  
53  
54 different voltages in electrical injuries. *Ulus Travma Acil Cerrahi Derg.* 2011;17(4):349-353.  
55  
56  
57  
58  
59  
60

- 1  
2  
3 22. Holliman CJ, Saffle JR, Kravitz M, et al. Early surgical decompression in the management of  
4  
5 electrical injuries. *Am J Surg*. 1982;144:133.  
6  
7  
8 23. Advanced trauma life support program for physicians, Student and Instructor  
9  
10 Manual. American College of Surgeons, Chicago; 1997.  
11  
12 24. Price TG, Cooper MA. Electrical and lightning injuries. In: Marx JA, Hockberger RS, Walls  
13  
14 RM, et al., eds. *Rosen's Emergency Medicine: Concepts and Clinical Practice*. 8<sup>th</sup> ed.  
15  
16 Philadelphia, PA: Elsevier Mosby; 2014: Chapter 142.  
17  
18  
19 25. Jaffe RH. Electropathology: a review of the pathologic changes produced by electric  
20  
21 currents. *Arch Pathol*. 1928;5:839.  
22  
23  
24 26. Kobernick M. Electrical injuries: pathophysiology and emergency management. *Ann Emerg*  
25  
26 *Med*. 1982;11:633.  
27  
28  
29 27. Puschel K, Brinkman B, Lieske K. Ultrastructural alteration of skeletal muscles after  
30  
31 electrical shock. *Am J Forensic Med Pathol*. 1985;6:246.  
32  
33  
34 28. Bongard O, Fagrell B. Delayed arterial thrombosis following an apparently trivial low-  
35  
36 voltage electrical injury. *Vasa*. 1989;18:162.  
37  
38  
39 29. Rosenberg M, Mehta N, Rosenberg L, et al. Immediate and long-term psychological  
40  
41 problems for survivors of severe pediatric electrical injury. *Burns*. 2015;41(8):1823-1830.  
42  
43  
44 30. Meyer WJ, Blakeney P, Thomas CR, et al. Prevalence of Major Psychiatric Illness in Young  
45  
46 Adults Who Were Burned as Children. *Psychosom Med*. 2007;69:377-382.  
47  
48  
49  
50  
51  
52  
53  
54  
55  
56  
57  
58  
59  
60

**Figure 1. Neuropsychological symptoms of EI patients during the acute phase of treatment.** Abbreviations: HVI, high-voltage injury; LVI, low-voltage injury.

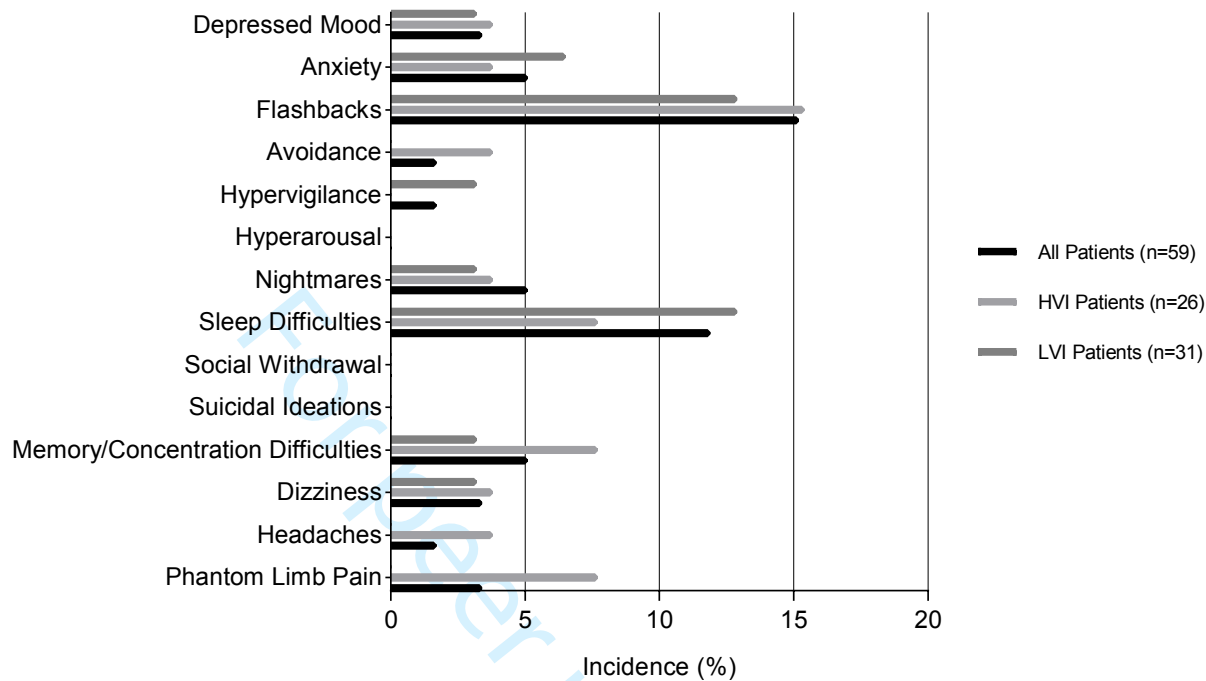

**Figure 2. Neuropsychological symptoms of EI patients during the long-term phase of treatment.** Abbreviations: HVI, high-voltage injury; LVI, low-voltage injury.

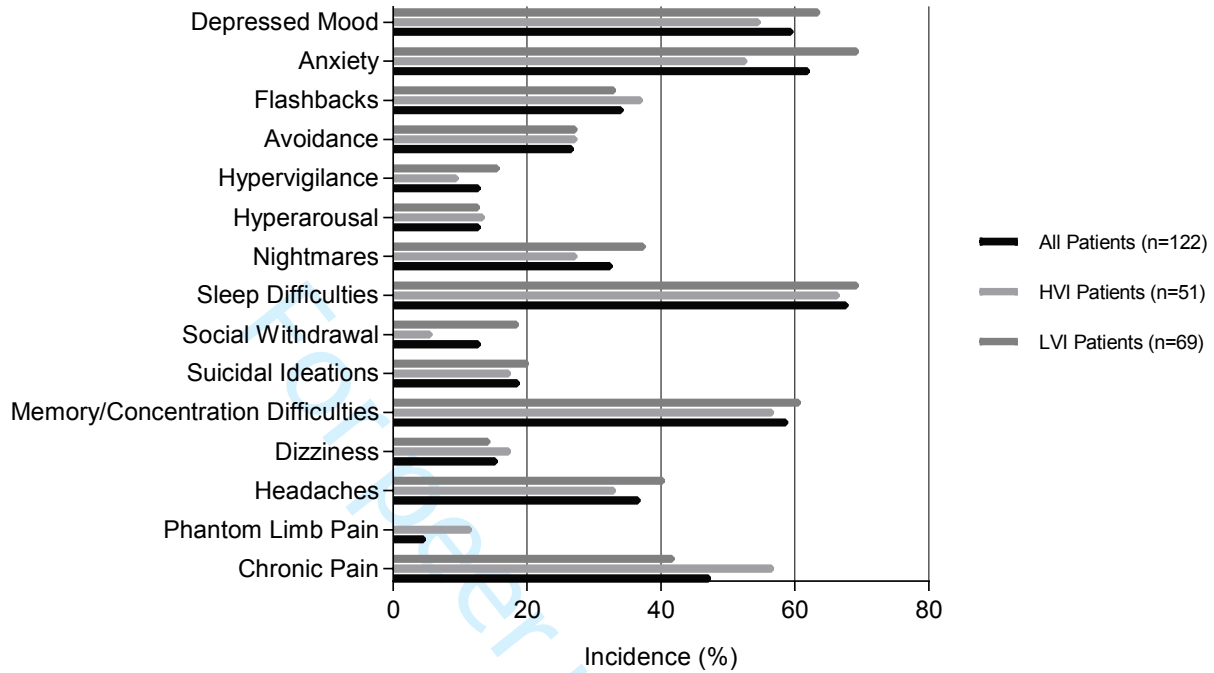

## Supplementary Online Content

**Supplementary Figure 1.** Patient flow diagram.

**Supplementary Figure 2.** Annual admissions of acute electrical injuries at the *Ross Tilley Burn Centre*, Toronto, Canada.

**Supplementary Figure 3.** Kaplan-Meier Survival Curve.

**Supplementary Figure 4.** Rates of psychiatric diagnoses among the long-term cohort.

**Supplementary Table 1.** Demographics and injury characteristics of patients treated acutely at the burn centre.

**Supplementary Table 2.** Demographics and injury characteristics of the long-term cohort.

**Supplementary Table 3.** Time to diagnosis (from day of injury) of psychiatric conditions during the long-term period of treatment.

**Supplementary Table 4.** Rates of neuropsychological symptoms in patients formally diagnosed with a psychiatric condition in the long-term cohort.

**Supplementary Figure 1. Patient Flow Diagram.** Abbreviations: RTBC, Ross Tilley Burn Centre; SJRH, St. John’s Rehabilitation Hospital; RTW, return-to-work.

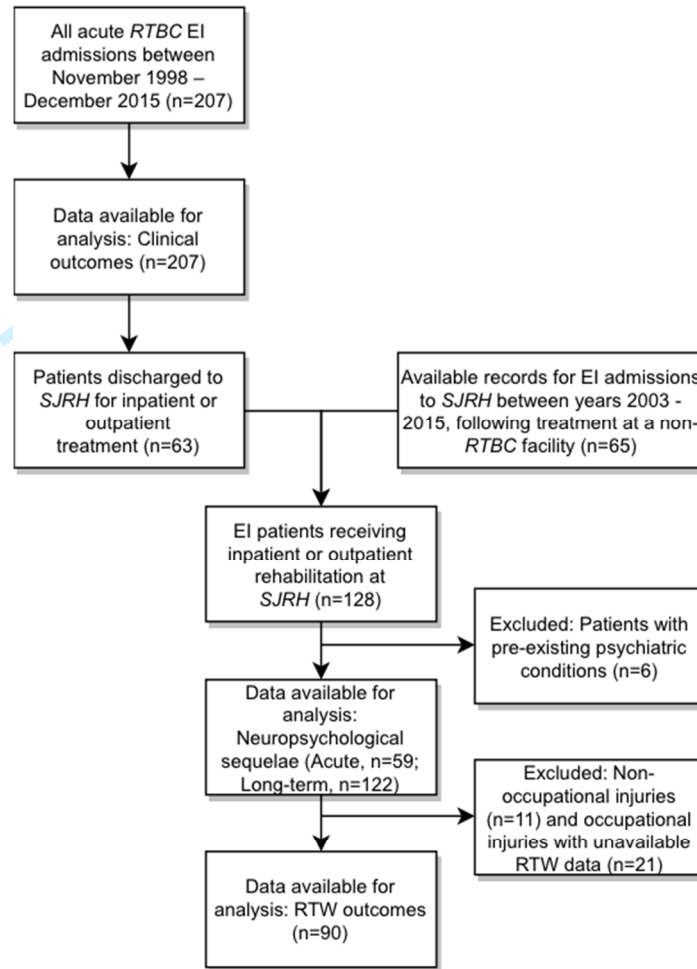

Only



**Supplementary Figure 2. Annual admissions of acute electrical injuries at the Ross Tilley Burn Centre, Toronto, Canada.** A total of 9 admissions were of unknown voltage. Abbreviations: HVI, high-voltage injury; LVI, low-voltage injury.

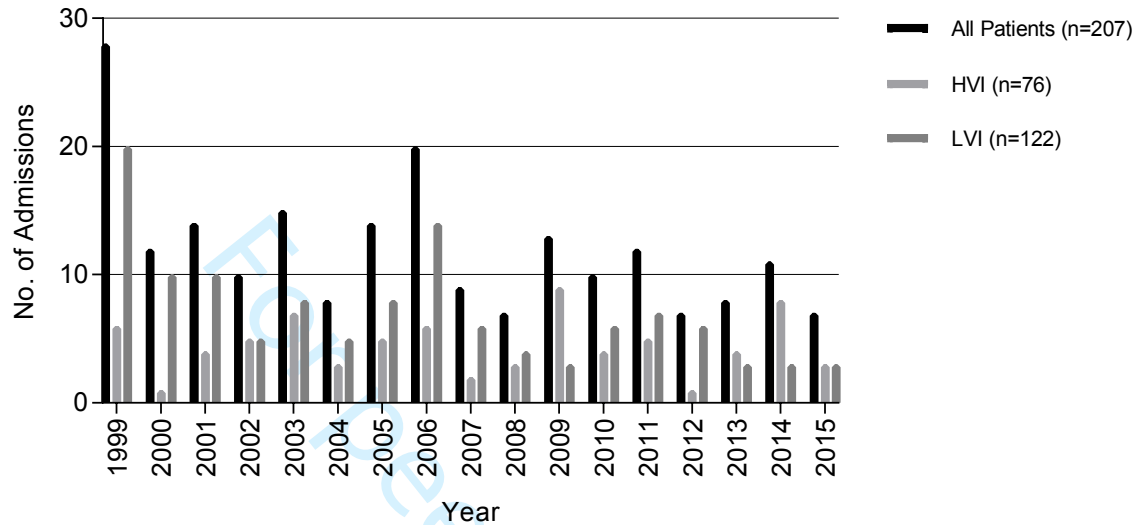

**Supplementary Figure 3. Kaplan-Meier Survival Curve.** Abbreviations: HVI, high-voltage injury; LVI, low-voltage injury;

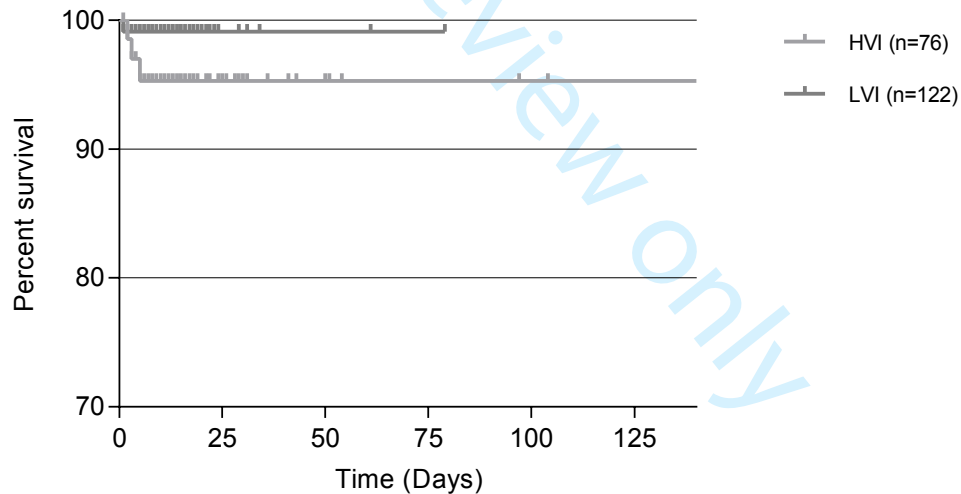

| No. at risk |     |    |   |   |   |   |
|-------------|-----|----|---|---|---|---|
| HVI:        | 76  | 18 | 7 | 3 | 2 | 1 |
| LVI:        | 117 | 5  | 2 | 1 | 0 | 0 |

### Supplementary Figure 4. Rates of psychiatric diagnoses among the long-term cohort.

Abbreviations: HVI, high-voltage injury; LVI, low-voltage injury; PTSD, post-traumatic stress disorder; MDD, major depressive disorder; GAD, generalized anxiety disorder; AD, adjustment disorder; PD, panic disorder.

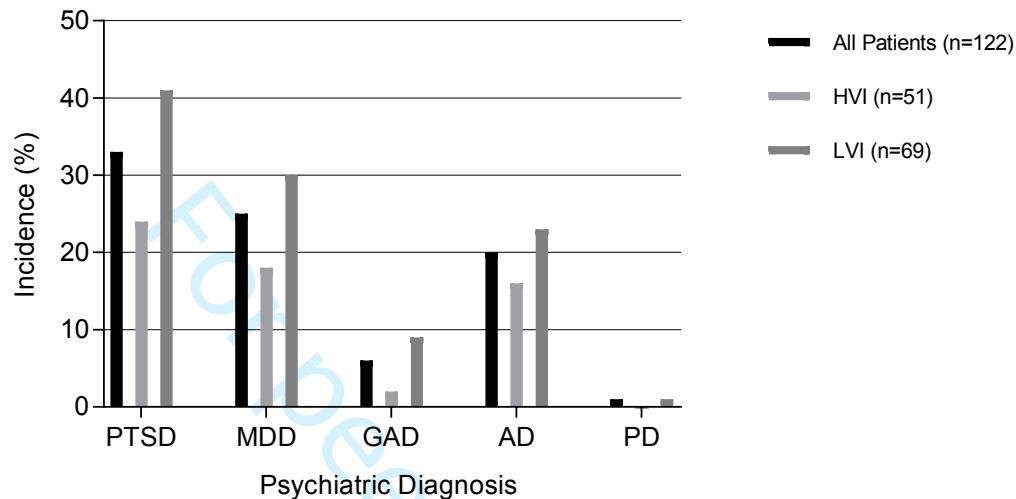

### Supplementary Table 1. Demographics and injury characteristics of patients treated acutely at the burn centre.

|                            | All Patients <sup>a</sup> | HVI     | LVI      | <i>P</i> |
|----------------------------|---------------------------|---------|----------|----------|
| No. of patients            | 207                       | 76      | 122      |          |
| Age, years, mean (SD)      | 41 (13)                   | 40 (14) | 41 (13)  | 0.64     |
| Male, no. (%)              | 198 (96)                  | 72 (95) | 117 (96) | 0.74     |
| TBSA, %, mean (SD)         | 8 (12)                    | 10 (13) | 8 (11)   | 0.17     |
| Inhalation injury, no. (%) | 4 (2)                     | 1 (1)   | 3 (3)    | >.99     |
| Work-Related, no. (%)      | 171 (83)                  | 57 (75) | 107 (88) | .03      |
| Classification, no. (%)    |                           |         |          |          |
| Contact                    | 67 (33)                   | 11 (15) | 18 (15)  | >.99     |
| Flash                      | 115 (56)                  | 10 (13) | 101 (83) | <.001    |
| Contact and Flash          | 15 (7)                    | 46 (61) | 3 (3)    | <.001    |
| Lightning                  | 4 (2)                     | 4 (5)   | 0 (0)    | .02      |
| Unspecified                | 6 (3)                     | 5 (7)   | 0 (0)    | .008     |

Abbreviations: HVI, high-voltage injury; LVI, low-voltage injury; TBSA, total body surface area.

<sup>a</sup> Includes patients whose voltage was not otherwise specified (n=9).

**Supplementary Table 2. Demographics and injury characteristics of the long-term cohort.**

|                                | All Patients <sup>a</sup> | HVI     | LVI     | P     |
|--------------------------------|---------------------------|---------|---------|-------|
| No. of patients                | 122                       | 51      | 69      |       |
| Work-Related, no. (%)          | 111 (91)                  | 47 (92) | 62 (90) | >.99  |
| Available RTW data, no. (%)    | 90 (81)                   | 39 (83) | 49 (79) | .54   |
| Pre-Injury Occupation, no. (%) |                           |         |         |       |
| Electrician                    | 26 (29)                   | 6 (15)  | 19 (39) | .02   |
| Mechanic                       | 3 (3)                     | 0 (0)   | 3 (6)   | .25   |
| Maintenance Worker             | 4 (4)                     | 0 (0)   | 4 (8)   | .13   |
| Powerline Technician           | 13 (14)                   | 13 (33) | 0 (0)   | <.001 |
| Construction Worker            | 4 (4)                     | 4 (10)  | 0 (0)   | .04   |
| Self-Employed                  | 2 (2)                     | 2 (5)   | 0 (0)   | .19   |
| Truck Driver                   | 3 (3)                     | 3 (8)   | 0 (0)   | .08   |
| Other                          | 29 (32)                   | 8 (21)  | 21 (43) | .04   |
| Unknown                        | 6 (7)                     | 3 (8)   | 2 (4)   | .65   |

Abbreviations: HVI, high-voltage injury; LVI, low-voltage injury; RTW, return-to-work.  
 Analysis excludes patients with documented pre-existing psychiatric conditions.  
<sup>a</sup> Includes patients whose voltage was not otherwise specified (n=2).

**Supplementary Table 3. Time to diagnosis (from day of injury) of psychiatric conditions during the long-term period of treatment.**

|                                                             | All Patients   | HVI            | LVI            | P   |
|-------------------------------------------------------------|----------------|----------------|----------------|-----|
| All Conditions (n=101), days, median (IQR) <sup>a,b</sup>   | 315 (117-957)  | 384 (161-1461) | 272 (114-904)  | .20 |
| PTSD (n=40), days, median (IQR)                             | 263 (78-937)   | 325 (153-1495) | 253 (75-843)   | .41 |
| MDD (n=30), days, median (IQR)                              | 531 (213-1061) | 684 (265-1897) | 402 (151-1013) | .33 |
| GAD (n=7), days, median (IQR)                               | 402 (261-1060) | -              | 374 (252-891)  | -   |
| Adjustment Disorder (n=23), days, median (IQR) <sup>b</sup> | 177 (88-771)   | 177 (63-1042)  | 177 (99-358)   | .82 |
| Panic Disorder (n=1), days, median (IQR)                    | -              | -              | -              | -   |

Abbreviations: HVI, high-voltage injury; LVI, low-voltage injury; PTSD, post-traumatic stress disorder; MDD, major depressive disorder; GAD, generalized anxiety disorder.  
 Analysis excludes patients with documented pre-existing psychiatric conditions.  
<sup>a</sup> Conditions include PTSD, MDD, GAD, adjustment disorder and panic disorder.  
<sup>b</sup> Patients without documented diagnoses dates were excluded from analysis (n=1).

**Supplementary Table 4. Rates of neuropsychological symptoms in patients formally diagnosed with a psychiatric condition in the long-term cohort.**

|                                            | <b>PTSD</b> | <b>MDD</b> | <b>GAD</b> | <b>Adjustment Disorder</b> | <b>Panic Disorder</b> |
|--------------------------------------------|-------------|------------|------------|----------------------------|-----------------------|
| No. of patients                            | 40          | 30         | 7          | 24                         | 1                     |
| Depressed Mood, no. (%)                    | 34 (85)     | 29 (97)    | 7 (100)    | 24 (100)                   | 1 (100)               |
| Anxiety, no. (%)                           | 38 (95)     | 28 (93)    | 7 (100)    | 21 (88)                    | 1 (100)               |
| Flashbacks, no. (%)                        | 23 (58)     | 13 (43)    | 2 (29)     | 13 (54)                    | 1 (100)               |
| Avoidance, no. (%)                         | 17 (43)     | 15 (50)    | 4 (57)     | 10 (42)                    | 1 (100)               |
| Hypervigilance, no. (%)                    | 8 (20)      | 9 (30)     | 1 (14)     | 2 (8)                      | 0 (0)                 |
| Hyperarousal, no. (%)                      | 13 (33)     | 8 (27)     | 1 (14)     | 5 (21)                     | 1 (100)               |
| Nightmares, no. (%)                        | 21 (53)     | 16 (53)    | 6 (86)     | 14 (58)                    | 0 (0)                 |
| Sleep Difficulties, no. (%)                | 37 (93)     | 28 (93)    | 7 (100)    | 22 (92)                    | 1 (100)               |
| Social Withdrawal, no. (%)                 | 10 (25)     | 8 (27)     | 2 (29)     | 4 (17)                     | 0 (0)                 |
| Suicidal Ideations, no. (%)                | 18 (45)     | 15 (50)    | 4 (57)     | 9 (38)                     | 1 (100)               |
| Memory/Concentration Difficulties, no. (%) | 33 (83)     | 29 (97)    | 7 (100)    | 21 (88)                    | 1 (100)               |
| Dizziness, no. (%)                         | 7 (18)      | 7 (23)     | 2 (29)     | 7 (29)                     | 0 (0)                 |
| Headaches, no. (%)                         | 19 (48)     | 15 (50)    | 4 (57)     | 17 (71)                    | 0 (0)                 |
| Phantom Limb Pain, no. (%)                 | 2 (5)       | 2 (7)      | 1 (14)     | 1 (4)                      | 0 (0)                 |
| Chronic Pain, no. (%)                      | 24 (60)     | 23 (77)    | 3 (43)     | 16 (67)                    | 0 (0)                 |

Abbreviations: PTSD, post-traumatic stress disorder; MDD, major depressive disorder; GAD, generalized anxiety disorder.  
Analysis excludes patients with documented pre-existing psychiatric conditions.

# Reporting checklist for cohort study.

Based on the STROBE cohort guidelines.

## Instructions to authors

Complete this checklist by entering the page numbers from your manuscript where readers will find each of the items listed below.

Your article may not currently address all the items on the checklist. Please modify your text to include the missing information. If you are certain that an item does not apply, please write "n/a" and provide a short explanation.

Upload your completed checklist as an extra file when you submit to a journal.

In your methods section, say that you used the STROBE cohort reporting guidelines, and cite them as:

von Elm E, Altman DG, Egger M, Pocock SJ, Gotsche PC, Vandembroucke JP. The Strengthening the Reporting of Observational Studies in Epidemiology (STROBE) Statement: guidelines for reporting observational studies.

|                        |     | Reporting Item                                                                                                                  | Page Number |
|------------------------|-----|---------------------------------------------------------------------------------------------------------------------------------|-------------|
| Title                  | #1a | Indicate the study's design with a commonly used term in the title or the abstract                                              | 3           |
| Abstract               | #1b | Provide in the abstract an informative and balanced summary of what was done and what was found                                 | 4-5         |
| Background / rationale | #2  | Explain the scientific background and rationale for the investigation being reported                                            | 7           |
| Objectives             | #3  | State specific objectives, including any prespecified hypotheses                                                                | 8           |
| Study design           | #4  | Present key elements of study design early in the paper                                                                         | 9           |
| Setting                | #5  | Describe the setting, locations, and relevant dates, including periods of recruitment, exposure, follow-up, and data collection | 9           |
| Eligibility criteria   | #6a | Give the eligibility criteria, and the sources and methods of selection of participants. Describe methods of follow-up.         | 9           |

|    |                |      |                                                                   |          |
|----|----------------|------|-------------------------------------------------------------------|----------|
| 1  |                | #6b  | For matched studies, give matching criteria and number of         | See note |
| 2  |                |      | exposed and unexposed                                             | 1        |
| 3  |                |      |                                                                   |          |
| 4  | Variables      | #7   | Clearly define all outcomes, exposures, predictors, potential     | 9-10     |
| 5  |                |      | confounders, and effect modifiers. Give diagnostic criteria, if   |          |
| 6  |                |      | applicable                                                        |          |
| 7  |                |      |                                                                   |          |
| 8  |                |      |                                                                   |          |
| 9  |                |      |                                                                   |          |
| 10 | Data sources / | #8   | For each variable of interest give sources of data and details of | 9-10     |
| 11 | measurement    |      | methods of assessment (measurement). Describe                     |          |
| 12 |                |      | comparability of assessment methods if there is more than one     |          |
| 13 |                |      | group. Give information separately for for exposed and            |          |
| 14 |                |      | unexposed groups if applicable.                                   |          |
| 15 |                |      |                                                                   |          |
| 16 |                |      |                                                                   |          |
| 17 |                |      |                                                                   |          |
| 18 | Bias           | #9   | Describe any efforts to address potential sources of bias         | See note |
| 19 |                |      |                                                                   | 2        |
| 20 |                |      |                                                                   |          |
| 21 |                |      |                                                                   |          |
| 22 | Study size     | #10  | Explain how the study size was arrived at                         | 9        |
| 23 |                |      |                                                                   |          |
| 24 | Quantitative   | #11  | Explain how quantitative variables were handled in the            | 9        |
| 25 | variables      |      | analyses. If applicable, describe which groupings were chosen,    |          |
| 26 |                |      | and why                                                           |          |
| 27 |                |      |                                                                   |          |
| 28 |                |      |                                                                   |          |
| 29 |                |      |                                                                   |          |
| 30 | Statistical    | #12a | Describe all statistical methods, including those used to control | 11       |
| 31 | methods        |      | for confounding                                                   |          |
| 32 |                |      |                                                                   |          |
| 33 |                |      |                                                                   |          |
| 34 |                | #12b | Describe any methods used to examine subgroups and                | 11       |
| 35 |                |      | interactions                                                      |          |
| 36 |                |      |                                                                   |          |
| 37 |                |      |                                                                   |          |
| 38 |                | #12c | Explain how missing data were addressed                           | 12       |
| 39 |                |      |                                                                   |          |
| 40 |                | #12d | If applicable, explain how loss to follow-up was addressed        | n/a      |
| 41 |                |      |                                                                   |          |
| 42 |                | #12e | Describe any sensitivity analyses                                 | See note |
| 43 |                |      |                                                                   | 3        |
| 44 |                |      |                                                                   |          |
| 45 |                |      |                                                                   |          |
| 46 | Participants   | #13a | Report numbers of individuals at each stage of study—eg           | 12-15    |
| 47 |                |      | numbers potentially eligible, examined for eligibility, confirmed |          |
| 48 |                |      | eligible, included in the study, completing follow-up, and        |          |
| 49 |                |      | analysed. Give information separately for for exposed and         |          |
| 50 |                |      | unexposed groups if applicable.                                   |          |
| 51 |                |      |                                                                   |          |
| 52 |                |      |                                                                   |          |
| 53 |                |      |                                                                   |          |
| 54 |                | #13b | Give reasons for non-participation at each stage                  | 12-15    |
| 55 |                |      |                                                                   |          |
| 56 |                |      |                                                                   |          |
| 57 |                | #13c | Consider use of a flow diagram                                    | 9        |
| 58 |                |      |                                                                   |          |
| 59 |                |      |                                                                   |          |
| 60 |                |      |                                                                   |          |

|    |                  |      |                                                                                                                                                                                                                   |               |
|----|------------------|------|-------------------------------------------------------------------------------------------------------------------------------------------------------------------------------------------------------------------|---------------|
| 1  | Descriptive data | #14a | Give characteristics of study participants (eg demographic, clinical, social) and information on exposures and potential confounders. Give information separately for exposed and unexposed groups if applicable. | 12-15         |
| 2  |                  |      |                                                                                                                                                                                                                   |               |
| 3  |                  |      |                                                                                                                                                                                                                   |               |
| 4  |                  |      |                                                                                                                                                                                                                   |               |
| 5  |                  |      |                                                                                                                                                                                                                   |               |
| 6  |                  |      |                                                                                                                                                                                                                   |               |
| 7  |                  |      |                                                                                                                                                                                                                   |               |
| 8  |                  | #14b | Indicate number of participants with missing data for each variable of interest                                                                                                                                   | 12-15         |
| 9  |                  |      |                                                                                                                                                                                                                   |               |
| 10 |                  |      |                                                                                                                                                                                                                   |               |
| 11 |                  | #14c | Summarise follow-up time (eg, average and total amount)                                                                                                                                                           | 16            |
| 12 |                  |      |                                                                                                                                                                                                                   |               |
| 13 |                  |      |                                                                                                                                                                                                                   |               |
| 14 | Outcome data     | #15  | Report numbers of outcome events or summary measures over time. Give information separately for exposed and unexposed groups if applicable.                                                                       | 12-18         |
| 15 |                  |      |                                                                                                                                                                                                                   |               |
| 16 |                  |      |                                                                                                                                                                                                                   |               |
| 17 |                  |      |                                                                                                                                                                                                                   |               |
| 18 |                  |      |                                                                                                                                                                                                                   |               |
| 19 | Main results     | #16a | Give unadjusted estimates and, if applicable, confounder-adjusted estimates and their precision (eg, 95% confidence interval). Make clear which confounders were adjusted for and why they were included          | 12-18         |
| 20 |                  |      |                                                                                                                                                                                                                   |               |
| 21 |                  |      |                                                                                                                                                                                                                   |               |
| 22 |                  |      |                                                                                                                                                                                                                   |               |
| 23 |                  |      |                                                                                                                                                                                                                   |               |
| 24 |                  |      |                                                                                                                                                                                                                   |               |
| 25 |                  |      |                                                                                                                                                                                                                   |               |
| 26 |                  | #16b | Report category boundaries when continuous variables were categorized                                                                                                                                             | 12-18         |
| 27 |                  |      |                                                                                                                                                                                                                   |               |
| 28 |                  |      |                                                                                                                                                                                                                   |               |
| 29 |                  |      |                                                                                                                                                                                                                   |               |
| 30 |                  | #16c | If relevant, consider translating estimates of relative risk into absolute risk for a meaningful time period                                                                                                      | See note<br>4 |
| 31 |                  |      |                                                                                                                                                                                                                   |               |
| 32 |                  |      |                                                                                                                                                                                                                   |               |
| 33 |                  |      |                                                                                                                                                                                                                   |               |
| 34 | Other analyses   | #17  | Report other analyses done—e.g., analyses of subgroups and interactions, and sensitivity analyses                                                                                                                 | 12-18         |
| 35 |                  |      |                                                                                                                                                                                                                   |               |
| 36 |                  |      |                                                                                                                                                                                                                   |               |
| 37 | Key results      | #18  | Summarise key results with reference to study objectives                                                                                                                                                          | 19            |
| 38 |                  |      |                                                                                                                                                                                                                   |               |
| 39 |                  |      |                                                                                                                                                                                                                   |               |
| 40 | Limitations      | #19  | Discuss limitations of the study, taking into account sources of potential bias or imprecision. Discuss both direction and magnitude of any potential bias.                                                       | 21            |
| 41 |                  |      |                                                                                                                                                                                                                   |               |
| 42 |                  |      |                                                                                                                                                                                                                   |               |
| 43 |                  |      |                                                                                                                                                                                                                   |               |
| 44 |                  |      |                                                                                                                                                                                                                   |               |
| 45 | Interpretation   | #20  | Give a cautious overall interpretation considering objectives, limitations, multiplicity of analyses, results from similar studies, and other relevant evidence.                                                  | 21-22         |
| 46 |                  |      |                                                                                                                                                                                                                   |               |
| 47 |                  |      |                                                                                                                                                                                                                   |               |
| 48 |                  |      |                                                                                                                                                                                                                   |               |
| 49 |                  |      |                                                                                                                                                                                                                   |               |
| 50 | Generalisability | #21  | Discuss the generalisability (external validity) of the study results                                                                                                                                             | 21-22         |
| 51 |                  |      |                                                                                                                                                                                                                   |               |
| 52 |                  |      |                                                                                                                                                                                                                   |               |
| 53 |                  |      |                                                                                                                                                                                                                   |               |
| 54 | Funding          | #22  | Give the source of funding and the role of the funders for the present study and, if applicable, for the original study on which the present article is based                                                     | 23            |
| 55 |                  |      |                                                                                                                                                                                                                   |               |
| 56 |                  |      |                                                                                                                                                                                                                   |               |
| 57 |                  |      |                                                                                                                                                                                                                   |               |
| 58 |                  |      |                                                                                                                                                                                                                   |               |
| 59 |                  |      |                                                                                                                                                                                                                   |               |
| 60 |                  |      |                                                                                                                                                                                                                   |               |

## Author notes

1. n/a - this was not a matched study
2. n/a - we were unable to account for two of the biases that affected our study (discussed on pg. 21)
3. n/a - our methods did not employ any sensitivity analyses
4. n/a - was not relevant to our study

The STROBE checklist is distributed under the terms of the Creative Commons Attribution License CC-BY. This checklist was completed on 11. August 2018 using <http://www.goodreports.org/>, a tool made by the [EQUATOR Network](#) in collaboration with [Penelope.ai](#)



# BMJ Open

## Acute and long-term clinical, neuropsychological, and return-to-work sequelae following electrical injury: a retrospective cohort study

|                                 |                                                                                                                                                                                                                                                                                                                           |
|---------------------------------|---------------------------------------------------------------------------------------------------------------------------------------------------------------------------------------------------------------------------------------------------------------------------------------------------------------------------|
| Journal:                        | <i>BMJ Open</i>                                                                                                                                                                                                                                                                                                           |
| Manuscript ID                   | bmjopen-2018-025990.R1                                                                                                                                                                                                                                                                                                    |
| Article Type:                   | Research                                                                                                                                                                                                                                                                                                                  |
| Date Submitted by the Author:   | 01-Dec-2018                                                                                                                                                                                                                                                                                                               |
| Complete List of Authors:       | Radulovic, Nada; Queen's University School of Medicine, Mason, Stephanie; Sunnybrook Health Sciences Centre, Ross Tilley Burn Centre<br>Rehou, Sarah; Sunnybrook Research Institute<br>Godleski, Matthew; St. John's Rehabilitation Hospital<br>Jeschke, Marc; Sunnybrook Health Sciences Centre, Ross Tilley Burn Centre |
| <b>Primary Subject Heading</b>: | Surgery                                                                                                                                                                                                                                                                                                                   |
| Secondary Subject Heading:      | Rehabilitation medicine                                                                                                                                                                                                                                                                                                   |
| Keywords:                       | Electrical Injuries, Burns, Rehabilitation                                                                                                                                                                                                                                                                                |
|                                 |                                                                                                                                                                                                                                                                                                                           |

SCHOLARONE™  
Manuscripts

1  
2  
3 **Acute and long-term clinical, neuropsychological, and return-to-work sequelae following electrical**  
4  
5 **injury: a retrospective cohort study**  
6  
7

8  
9 Nada Radulovic BSc<sup>1,2</sup>, Stephanie A. Mason MD PhD<sup>1,3</sup>, Sarah Rehou MS<sup>1</sup>, Matthew Godleski MD<sup>4,5</sup>,  
10  
11 Marc G. Jeschke MD PhD FACS FCCM FRCS(C)<sup>1,6,7</sup>  
12  
13

14  
15  
16 <sup>1</sup> Ross Tilley Burn Centre, Sunnybrook Health Sciences Centre, Toronto, Ontario, Canada

17  
18 <sup>2</sup> School of Medicine, Queen's University, Kingston, Ontario, Canada

19  
20 <sup>3</sup> Division of General Surgery, Department of Surgery, Faculty of Medicine, University of Toronto,  
21  
22 Toronto, Ontario, Canada

23  
24 <sup>4</sup> St. John's Rehabilitation Hospital, Toronto, Ontario, Canada

25  
26 <sup>5</sup> Division of Physical Medicine and Rehabilitation, Department of Medicine, Faculty of Medicine,  
27  
28 University of Toronto, Toronto, Ontario, Canada

29  
30 <sup>6</sup> Division of Plastic and Reconstructive Surgery, Department of Surgery, Faculty of Medicine, University  
31  
32 of Toronto, Toronto, Ontario, Canada

33  
34  
35 <sup>7</sup> Department of Immunology, Faculty of Medicine, University of Toronto, Toronto, Ontario, Canada

36  
37 **Corresponding author and person to whom reprint request should be addressed:**

38  
39 Marc Jeschke, MD PhD FACS FCCM FRCS(C)

40  
41 Professor - University of Toronto

42  
43 Department of Surgery, Division of Plastic Surgery, Department of Immunology

44  
45 Director Ross Tilley Burn Centre - Sunnybrook Health Sciences Centre

46  
47 Rm D704, 2075 Bayview Ave. Toronto, ON M4N 3M5, Canada

48  
49 Tel: 416-480-6703, Fax: 416-480-6763

50  
51 email: marc.jeschke@sunnybrook.ca

52  
53  
54 **ABSTRACT**  
55  
56  
57  
58  
59  
60

1  
2  
3 **Objective:** To determine acute and long-term clinical, neuropsychological, and return-to-work  
4 (RTW) effects of electrical injuries (EIs). This study aims to further contrast sequelae between  
5  
6 (RTW) effects of electrical injuries (EIs). This study aims to further contrast sequelae between  
7  
8 low- and high-voltage injuries (LVIs, HVIs). We hypothesize that all EIs will result in  
9  
10 substantial adverse effects during both phases of management, with HVIs contributing to greater  
11  
12 rates of sequelae.  
13

14  
15 **Design:** Retrospective cohort study evaluating EI admissions between 1998-2015.  
16

17 **Setting:** Provincial burn centre and rehabilitation hospital specializing in EI management.  
18

19 **Participants:** All EI admissions were reviewed for acute clinical outcomes (n=207). For long-  
20  
21 term outcomes, rehabilitation patients, who were referred from the burn centre (n=63) or other  
22  
23 burn units across the province (n=65), were screened for inclusion. Six patients were excluded  
24  
25 due to pre-existing psychiatric conditions. This cohort (n=122) was assessed for long-term  
26  
27 outcomes. Median time to first and last follow-up was 201(IQR 68-766) and 980(IQR 391-1409)  
28  
29 days, respectively.  
30  
31

32  
33 **Outcome measures:** Acute and long-term clinical, neuropsychological, and RTW.  
34

35 **Results:** Acute clinical complications included infections (14%) and amputations (13%). HVIs  
36  
37 resulted in greater rates of these complications, including compartment syndrome (16% vs. 4%,  
38  
39  $P=.007$ ) and rhabdomyolysis (12% vs. 0%,  $P<.001$ ). Rates of acute neuropsychological sequelae  
40  
41 were similar between voltage groups. Long-term outcomes were dominated by insomnia (68%),  
42  
43 anxiety (62%), PTSD (33%) and MDD (25%). Sleep difficulties (67%) were common following  
44  
45 HVIs, while the LVI group most frequently experienced sleep difficulties (70%) and anxiety  
46  
47 (70%). Ninety work-related EIs were available for RTW analysis. Sixty-one percent returned to  
48  
49 their pre-injury employment and 19% were unable to return to any form of work. RTW were  
50  
51 similar when compared between voltage groups.  
52  
53  
54  
55  
56  
57  
58  
59  
60

1  
2  
3 **Conclusions:** This is the first investigation to determine acute and long-term patient outcomes  
4  
5 post-EI as a continuum. Findings highlight substantial rates of neuropsychological and social  
6  
7 sequelae, regardless of voltage. Specialized and individualized early intervention including  
8  
9 screening for mental health are imperative to improve outcomes of EI patients.  
10  
11  
12  
13

14 **Keywords:** Electrical Injuries, Burns, Rehabilitation

15 **Word count:** 300 (max. 300)  
16  
17  
18  
19  
20  
21  
22  
23  
24  
25  
26  
27  
28  
29  
30  
31  
32  
33  
34  
35  
36  
37  
38  
39  
40  
41  
42  
43  
44  
45  
46  
47  
48  
49  
50  
51  
52  
53  
54  
55  
56  
57  
58  
59  
60

## ARTICLE SUMMARY

### Strengths and limitations of this study

- Our study evaluated broad sequelae, including clinical, neuropsychological and return-to-work parameters during acute and long-term intervals, which have not been collectively investigated for electrical injuries in prior studies.
- Outcome measures included a comprehensive list of neuropsychological symptoms and diagnoses that have not been contrasted between voltage groups in existing literature.
- Due to the longitudinal nature of our outcomes of interest, and the associated loss to follow-up, our findings may underrepresent the long-term neuropsychosocial sequelae within our study cohorts.

## INTRODUCTION

Electrical injuries (EIs) account for approximately 5% of all annual burn admissions in North America, yet are a leading cause of occupational burns worldwide.[1] These injuries result in substantial limitations that impede return to work (RTW) and decrease quality of life.[2-5] Several studies globally have proposed that EIs are implicated in persistent functional, cognitive and neuropsychological sequelae including flashbacks, depression, anxiety and post-traumatic stress disorder.[3,5,6-16] However, clinical evidence regarding such effects is limited, as the majority of reported findings are based on case reports or small clinical studies.[17]

Additionally, uncertainty with EI classification remains. EIs can be classified in various ways and defined as either high or low voltage. Currently, an EI below 1000 volts is considered a low voltage injury (LVI), whereas one of 1000 volts or greater is considered a high voltage injury (HVI). These voltage categories have been defined based on arcing risk.[18] Clear classification is necessary as LVIs and HVIs have been suggested to result in different clinical courses. For example, two recent reviews found that HVIs experience longer hospital stays and greater rates of complications relative to LVIs.[19-21] Differences between these EI subgroups during the acute and long-term phases of treatment are currently unknown.

Within our provincial health care system, a large proportion of EI survivors are treated at a single acute care surgical site, the *Ross Tilley Burn Centre (RTBC)* at *Sunnybrook Health Sciences Centre (SHSC)*. Typically, patients requiring ongoing inpatient or outpatient rehabilitation services are managed at *St. John's Rehabilitation Hospital (SJRH)*, which additionally serves as a referral site for other acute care centres and the workplace injury insurance system. Fewer sites allow for the centralization of services and collection of information for an uncommon diagnosis across multiple phases of care.

1  
2  
3           There are two primary objectives to this study. First, we aim to determine the effects of  
4  
5           EIs on the clinical course of acute hospitalization and long-term outcomes during rehabilitation.  
6  
7           The second objective is to examine and contrast individual short- and long-term outcomes by  
8  
9           voltage (HVI vs. LVI). We hypothesize that EIs result in substantial morbidity during acute  
10  
11           hospitalization and are associated with significant impairments in rehabilitation, RTW and  
12  
13           neuropsychology. Lastly, we expect HVIs to be implicated in more adverse clinical sequelae,  
14  
15           longer rehabilitation phases and poorer long-term outcomes.  
16  
17  
18  
19  
20  
21  
22  
23  
24  
25  
26  
27  
28  
29  
30  
31  
32  
33  
34  
35  
36  
37  
38  
39  
40  
41  
42  
43  
44  
45  
46  
47  
48  
49  
50  
51  
52  
53  
54  
55  
56  
57  
58  
59  
60

## MATERIALS AND METHODS

### Study design

We conducted a cohort study of all EI patients admitted to *RTBC* and *SJRH* between November 1998, the date of *RTBC* establishment at *SHSC*, and December 2015. This study was approved by the Research Ethics Board of *SHSC* (#075-2015). Patients were defined as HVI ( $\geq 1000$  V) or LVI ( $< 1000$  V), based on the voltage documented at the time of acute admission at *RTBC* or from existing records at the time of entering rehabilitation at *SJRH*.

We defined EI sequelae during two phases of treatment: (1) acutely, defined as the initial hospital admission at *RTBC*, and (2) long-term, defined as the period of inpatient and outpatient rehabilitation at *SJRH*. The long-term cohort included both patients treated at *RTBC* and those referred from other acute care centres. Patients with pre-existing psychiatric diagnoses, as identified in the admissions note from *RTBC* or *SJRH* medical records, were excluded from analysis of neuropsychological and RTW sequelae. Substance misuse was not included in our exclusion criteria (online supplementary figure 1).

### Acute period outcomes

Injury, demographic and clinical outcomes data were obtained through retrospective chart review of *RTBC* progress and summary notes. Variables collected included mean age, sex, median percentage of the total body surface area (%TBSA), presence of inhalation injury, work-related nature of the injury, voltage (HVI vs. LVI) and EI type (flash, contact, both contact and flash, lightning or unspecified).

Clinical outcomes during the acute period that were collected included length of stay (LOS) at *RTBC*, LOS adjusted for %TBSA (LOS/%TBSA), number of amputations, amputation levels and number of operations. Incidence of mortality, rhabdomyolysis, compartment



1  
2  
3 syndrome, one or more infections, sepsis, multiple organ failure, and rehabilitation requirements  
4  
5 (inpatient or outpatient) were additionally analyzed.  
6

7  
8 Patients transferred to *SJRH* for rehabilitation underwent neuropsychological screening  
9  
10 by the care team prior to discharge, as part of the required referral documentation. This screen  
11  
12 was observational and included the following symptoms: depressed mood, anxiety, flashbacks,  
13  
14 avoidance, hypervigilance, hyperarousal, nightmares, sleep difficulties, social withdrawal,  
15  
16 suicidal ideations, memory and concentration difficulties, dizziness, headaches and phantom  
17  
18 limb pain.  
19  
20

### 21 **Long-term period outcomes**

22  
23 Injury, demographic and neuropsychological outcomes data for patients in the long-term  
24  
25 cohort were obtained through chart review of *SJRH* documentation. Variables collected included  
26  
27 voltage (HVI vs. LVI), work-related nature of the EI and occupation. Neuropsychological  
28  
29 symptoms identified from rehabilitation records were rates of depressed mood, anxiety,  
30  
31 flashbacks, avoidance, hypervigilance, hyperarousal, nightmares, sleep difficulties, social  
32  
33 withdrawal, suicidal ideations, memory and concentration difficulties, dizziness, headaches,  
34  
35 phantom limb pain and chronic pain. Additionally, we recorded formal diagnoses of post-  
36  
37 traumatic stress disorder (PTSD), major depressive disorder (MDD), generalized anxiety  
38  
39 disorder (GAD), adjustment disorder and panic disorder, as well as the time to diagnosis post-  
40  
41 injury. Treatment by a psychologist or psychiatrist and the need for medications to address these  
42  
43 sequelae were also recorded, with rates defined as the proportion of patients requiring these  
44  
45 management modalities.  
46  
47  
48  
49  
50

51 Patients with work-related EIs had information recorded regarding RTW goals: time  
52  
53 required to return to pre-injury employment or alternative work in the labour market and the  
54  
55  
56  
57  
58  
59  
60

1  
2  
3 form of workplace accommodations (i.e. modified scheduling or duties). Patients who did not  
4  
5 have documented outcomes regarding their RTW status were excluded from this analysis.  
6  
7

### 8 **Patient and Public Involvement**

9  
10 Active patient and public involvement was not incorporated into this study.  
11

### 12 **Statistical analysis**

13  
14 Statistical analyses were performed using SPSS Statistics version 25.0 (IBM Corp.).  
15  
16 Categorical variables are presented as percentages, with group comparisons made using Fisher's  
17  
18 exact test. Normally-distributed continuous variables are presented as mean and standard  
19  
20 deviation (SD), and compared between groups using the student's t-test. Nonparametric data are  
21  
22 presented as median and interquartile range (IQR), and compared using the Mann-Whitney U  
23  
24 test. For all comparisons,  $P \leq .05$  was considered statistically significant.  
25  
26  
27  
28  
29  
30  
31  
32  
33  
34  
35  
36  
37  
38  
39  
40  
41  
42  
43  
44  
45  
46  
47  
48  
49  
50  
51  
52  
53  
54  
55  
56  
57  
58  
59  
60

## RESULTS

### Acute period

We identified 207 acute EI admissions between 1998-2015 that were eligible for inclusion (online supplementary figure 2). Of these acute patients, 106 were discharged to either inpatient or outpatient rehabilitation at any rehabilitation facility and therefore had neuropsychological assessment data available for review. Four patients were excluded due to pre-existing psychiatric conditions that were documented on admission in their hospital records. *SJRH* records were obtained for 59 of these patients who were identified as having received inpatient or outpatient treatment at this facility without a pre-existing psychiatric condition. Health records for patients who were admitted to *SJRH* prior to the year 2003 were not accessible, therefore, these patients were not included in further analysis.

### Demographics

Patients were predominantly male with a mean age of  $41 \pm 13$  years. Median burn size was 4 (1-10) %TBSA and the incidence of inhalation injury was 2%. LVIs were more common than HVIs (59% vs. 37%), and the voltage was unspecified for 9 patients. The most prevalent mechanism of EI was isolated flash injury, followed by direct contact with electrical current. The majority of injuries were work-related (83%; online supplementary table 1).

### Clinical outcomes

The average LOS and LOS/%TBSA were 9 (3-18) days and 2 (1-4) days/% burn, respectively. Two percent of patients did not survive to discharge, with coroner reports identifying the following causes: anoxia, ARDS and SIRS, sepsis, and massive burns. (Table 1, online supplementary figure 3). The most common complications during acute management were infection, amputation and compartment syndrome. Multiple organ failure occurred in 1% of patients. While 13% of patients required at least one amputation, 6% required multiple. The most

common amputation sites were the digits of the feet and the digits of the hands (36% and 29%, respectively), while the least common was above the elbow (2%). Overall, half of all EI patients required rehabilitation on discharge; of these, 32% and 68% were referred to inpatient and outpatient rehabilitation, respectively (Table 1).

**Table 1. Clinical outcomes during the acute phase of management.**

|                                                               | All Patients <sup>a</sup> | HVI       | LVI      | P      |
|---------------------------------------------------------------|---------------------------|-----------|----------|--------|
| No. of patients                                               | 207                       | 76        | 122      |        |
| LOS, days, median (IQR)                                       | 9 (3-18)                  | 14 (4-24) | 8 (3-15) | <0.001 |
| LOS/TBSA, days/%, median (IQR)                                | 2 (1-4)                   | 3 (1-8)   | 2 (1-3)  | <0.001 |
| TBSA, %, median (IQR)                                         | 4 (1-10)                  | 3 (1-15)  | 5 (2-9)  | .44    |
| No. of ORs, median (IQR)                                      | 1 (0-2)                   | 2 (0-3)   | 0 (0-1)  | <.001  |
| Complications, no. (%)                                        |                           |           |          |        |
| Rhabdomyolysis                                                | 9 (4)                     | 9 (12)    | 0 (0)    | <.001  |
| Compartment syndrome                                          | 17 (8)                    | 12 (16)   | 5 (4)    | .007   |
| Infection                                                     | 28 (14)                   | 15 (20)   | 11 (9)   | .05    |
| Sepsis                                                        | 11 (5)                    | 8 (11)    | 3 (3)    | .02    |
| Multiple organ failure                                        | 1 (1)                     | 1 (1)     | 0 (0)    | .38    |
| Amputation                                                    | 26 (13)                   | 21 (28)   | 3 (2)    | <.001  |
| Multiple amputations                                          | 13 (6)                    | 10 (13)   | 2 (2)    | .001   |
| Requiring rehabilitation, no. (%)                             | 106 (51)                  | 49 (65)   | 54 (44)  | .008   |
| Discharged to inpatient rehabilitation, no. (%) <sup>b</sup>  | 34 (32)                   | 22 (45)   | 10 (19)  | .005   |
| Discharged to outpatient rehabilitation, no. (%) <sup>b</sup> | 72 (68)                   | 27 (55)   | 44 (81)  | .005   |
| Mortality, no. (%)                                            | 4 (2)                     | 3 (4)     | 1 (1)    | .16    |

Abbreviations: HVI, high-voltage injury; LVI, low-voltage injury; LOS, length of stay; TBSA, total body surface area.  
<sup>a</sup> Includes patients whose voltage was not otherwise specified (n=9).  
<sup>b</sup> Percentages are calculated based on the total number of patients requiring any form of rehabilitation (All patients, n=106; HVI, n=49; LVI, n=54).

### Neuropsychological outcomes

Of the 59 patients with neuropsychological screening, nearly one quarter experienced at least one neuropsychological symptom during the acute period (Table 2). The most common symptoms included flashbacks (15%) and sleep difficulties (12%). Suicidal ideations, hyperarousal and social withdrawal did not occur during the acute phase of treatment (Figure 1).

**Table 2. Neuropsychological sequelae and management.**

|                                                    | All Patients <sup>a</sup> | HVI             | LVI            | <i>P</i> |
|----------------------------------------------------|---------------------------|-----------------|----------------|----------|
| <b>Acute Cohort</b>                                |                           |                 |                |          |
| No. of patients                                    | 59                        | 26              | 31             |          |
| Neuropsychological sequelae, no. (%)               | 14 (24)                   | 6 (23)          | 7 (23)         | >.99     |
| <b>Long-Term Cohort</b>                            |                           |                 |                |          |
| No. of patients                                    | 122                       | 51              | 69             |          |
| Days to first follow-up, median (IQR) <sup>b</sup> | 201 (68-766)              | 504 (179-1236)  | 124 (41-233)   | <.001    |
| Days to last follow-up, median (IQR) <sup>b</sup>  | 980 (391-1409)            | 1099 (511-1651) | 773 (315-1218) | .02      |
| Neuropsychological sequelae, no. (%)               |                           |                 |                |          |
| <5 yrs. post-injury                                | 99 (81)                   | 42 (82)         | 56 (81)        | >.99     |
| >5 yrs. post-injury <sup>c</sup>                   | 20 (27)                   | 13 (35)         | 7 (20)         | .19      |
| Psychological/Psychiatric treatment, no. (%)       | 78 (64)                   | 31 (61)         | 47 (68)        | .44      |
| Medication, no. (%)                                | 78 (64)                   | 30 (59)         | 47 (68)        | .34      |

Abbreviations: HVI, high-voltage injury; LVI, low-voltage injury.  
 Analysis excludes patients with documented pre-existing psychiatric conditions.  
<sup>a</sup> Includes patients whose voltage was not otherwise specified (acute cohort, n=2; long-term cohort, n=2).  
<sup>b</sup> Calculated from the date of injury.  
<sup>c</sup> Percentages are calculated based on the total number of patients that were available for follow-up at >5 years post-injury (All patients, n= 74; HVI, n=37; LVI, n=35).

## Acute period, high- vs low-voltage injuries

### Demographics

The acute cohort was comprised of 76 HVI and 122 LVI patients, with both groups being predominantly male. Both voltage cohorts were similar in mean age, median %TBSA and incidence of inhalation injury. LVIs were more likely of being occupational in nature ( $P=.03$ ). HVIs were more frequently a result of combined flash and contact burn etiology, whereas LVIs were more commonly associated with isolated flash injuries ( $P<.001$  for both; online supplementary table 1).

### Clinical outcomes

1  
2  
3 The incidence and severity of clinical outcomes were overall worse in the HVI group.  
4  
5 HVI patients experienced a longer LOS ( $P<0.001$ ) and LOS/%TBSA ( $P<.001$ ), and greater  
6  
7 incidences of rhabdomyolysis ( $P<0.001$ ), compartment syndrome ( $P=.007$ ), infections ( $P=.05$ ),  
8  
9 sepsis ( $P=.02$ ; Table 1) and operations ( $P<0.001$ ). However, there was no statistical difference in  
10  
11 survival between HVIs and LVIs (Table 1, online supplementary figure 3). Single and multiple  
12  
13 amputations were more common among HVI patients ( $P<.001$  and  $P=.001$ , respectively). The  
14  
15 majority of HVI amputations involved digits (29% hands, 36% feet). Lastly, patients with HVIs  
16  
17 were more frequently discharged to inpatient rehabilitation relative to LVIs ( $P=.005$ ), while  
18  
19 initial outpatient rehabilitation was more common in the LVI group ( $P=.005$ ; Table 1).

#### 20 21 22 23 24 Neuropsychological outcomes

25  
26 Of those screened, HVIs and LVIs were equally as likely of experiencing  
27  
28 neuropsychological sequelae during the acute treatment period ( $P>.99$ ; Table 2). Likewise, there  
29  
30 was no significant difference in the incidence of symptoms between voltage groups. Marginally  
31  
32 greater rates of the following symptoms were exhibited by the HVI group when contrasted with  
33  
34 the LVI group: depressed mood (4% vs. 3%,  $P>.99$ ), flashbacks (15% vs. 13%,  $P>.99$ ), dizziness  
35  
36 (4% vs. 3%,  $P>.99$ ), nightmares (4% vs. 3%,  $P>.99$ ), avoidance (4% vs. 0%,  $P=.46$ ), memory  
37  
38 and concentration impairments (8% vs. 3%,  $P=.59$ ), headaches (4% vs. 0%,  $P=.46$ ) and phantom  
39  
40 limb pain (8% vs. 0%,  $P=.20$ ). In contrast, LVIs were associated with slightly greater rates of  
41  
42 sleep difficulties (13% vs. 8%,  $P=.68$ ), anxiety (6% vs. 4%,  $P>.99$ ) and hypervigilance (3% vs.  
43  
44 0%,  $P>.99$ ; Figure 1).

#### 45 46 47 48 49 **Long-term period**

##### 50 51 Demographics

52  
53  
54 The long-term period cohort consisted of 128 patients, with a second screen identifying  
55  
56 six patients meeting exclusion criteria due to pre-existing psychiatric conditions. Therefore, 122

1  
2  
3 patients were available for analysis. Half of these patients had been treated for their acute injury  
4 at *RTBC*, therefore, acute data were available for those patients. The majority of patients in the  
5  
6 long-term cohort suffered EIs that were occupational in nature (91%, online supplementary table  
7  
8  
9  
10 2).

### 11 Neuropsychological outcomes

12  
13  
14  
15 More than half of all patients receiving rehabilitation were diagnosed with at least one  
16  
17 psychiatric disorder after their injury, while one third of patients were diagnosed with two or  
18  
19 more. The median time to a psychiatric diagnosis from the date of injury across all six conditions  
20  
21 was 315 days (IQR 117-957) (online supplementary table 3). PTSD (33%), MDD (25%) and  
22  
23 adjustment disorder (20%) were the conditions that occurred most frequently (online  
24  
25 supplementary figure 4). Additionally, 81% of the long-term cohort experienced at least one  
26  
27 neuropsychological symptom between a median time to first and last follow-up of 201 (IQR 68-  
28  
29 766) and 980 (IQR 391-1409) days post-injury, respectively (Table 2). The most common  
30  
31 symptoms were sleep difficulties (68%), anxiety (62%), depressed mood (60%) and memory and  
32  
33 concentration impairments (59%) (Figure 2). More than 60% of the long-term patient cohort  
34  
35 exhibited symptoms that were severe enough to warrant psychological/psychiatric treatment or  
36  
37 medication. Patients with PTSD most commonly exhibited symptoms of anxiety, sleep  
38  
39 difficulties and depressed mood (95%, 93% and 85%, respectively). MDD, GAD and adjustment  
40  
41 disorder were frequently associated with symptoms of depressed mood, anxiety, sleep difficulties  
42  
43 and memory and concentration impairments (online supplementary table 4).

### 44 Return-to-work outcomes

45  
46  
47  
48  
49  
50  
51 A total of 111 work-related EIs were reviewed; of these, data regarding RTW status were  
52  
53 recorded for 90 patients. Electricians made up the predominant occupation group, followed by  
54  
55 powerline technicians (online supplementary table 2). Sixty-one percent of patients were able to  
56  
57

return to their pre-injury occupation, of which 60% required modified duties and 55% required modified scheduling. Furthermore, 19% of patients sustaining work-related EIs returned to alternative employment through labour market re-entry (LMR), with the median time for returning to any work being 166 days (IQR 82-414) from the time of injury. Overall, one fifth of EI patients were unable to return to any form of employment (Table 3).

**Table 3. Return-to-work characteristics of occupational EIs within the long-term cohort.**

|                                              | All Patients <sup>a</sup> | HVI           | LVI          | <i>P</i> |
|----------------------------------------------|---------------------------|---------------|--------------|----------|
| No. of patients                              | 90                        | 39            | 49           |          |
| Return to pre-injury occupation, no. (%)     | 55 (61)                   | 23 (59)       | 30 (61)      | >.99     |
| Modified Duties, no. (%) <sup>b</sup>        | 33 (60)                   | 15 (65)       | 17 (57)      | .58      |
| Modified Schedule, no. (%) <sup>b</sup>      | 30 (55)                   | 11 (48)       | 17 (57)      | .59      |
| Labour Market Re-Entry, no. (%)              | 17 (19)                   | 9 (23)        | 8 (16)       | .80      |
| Time to RTW, days, median (IQR) <sup>c</sup> | 166 (82-414)              | 207 (102-548) | 124 (57-348) | .12      |
| Unable to RTW, no. (%)                       | 17 (19)                   | 6 (15)        | 11 (22)      | .43      |

Abbreviations: HVI, high-voltage injury; LVI, low-voltage injury; RTW, return-to-work.  
<sup>a</sup> Includes patients whose voltage was not otherwise specified (n=2).  
<sup>b</sup> Percentages are calculated based on the total number of patients that returned to their pre-injury occupation (All patients, n= 55; HVI, n=23; LVI, n=30).  
<sup>c</sup> Calculated from the date of injury.

### Long-term period, high- vs low-voltage injuries

#### Neuropsychological outcomes

The distribution of formal diagnoses of individual psychiatric disorders was comparable between HVIs and LVIs (online supplementary figure 4). PTSD and MDD were the most common in both voltage groups (24% vs. 41%,  $P=.054$  and 18% vs. 30%,  $P=.14$ , respectively), while panic disorder was the most infrequently diagnosed (0% and 1%,  $P>.99$ ). HVIs were most commonly associated with sleep difficulties (67%), memory and concentration impairment (57%), and chronic pain (57%), while LVIs were most commonly associated with sleep difficulties (70%) and anxiety (70%) (Figure 2). LVIs exhibited slightly greater rates of



1  
2  
3 depressed mood (64% vs. 55%,  $P=.35$ ), anxiety (70% vs. 53%,  $P=.09$ ), nightmares (38% vs.  
4  
5 27%,  $P=.33$ ), headaches (41% vs. 33%,  $P=.45$ ) and hypervigilance (16% vs. 10%,  $P=.42$ ),  
6  
7 however, these differences were not statistically significant. HVIs were more likely of exhibiting  
8  
9 neuropsychological sequelae beyond 5 years post-injury ( $P=.05$ ; Table 2). Additionally, our LVI  
10  
11 cohort experienced greater requirements for management, including medications and  
12  
13 psychological/psychiatric treatment, of these symptoms and conditions ( $P>.05$ ).  
14  
15

#### 16 17 Return-to-work outcomes

18  
19 LVI and HVIs had similar rates of return to pre-injury occupation. More than half of  
20  
21 these patients required workplace accommodation. HVI patients more frequently required  
22  
23 modified duties, while LVIs were more commonly associated with modified scheduling. The  
24  
25 requirement for LMR for alternative employment was similar between voltage groups, along  
26  
27 with the median time for RTW. A comparable inability to return to any form of employment was  
28  
29 observed between voltage groups (Table 3).  
30  
31  
32  
33  
34  
35  
36  
37  
38  
39  
40  
41  
42  
43  
44  
45  
46  
47  
48  
49  
50  
51  
52  
53  
54  
55  
56  
57  
58  
59  
60

## DISCUSSION

Our study identifies and delineates common sequelae that extend beyond acute management. When stratifying by voltage, the acute clinical findings indicate greater rates of complications and operative interventions in the HVI group. Conversely, rates of neuropsychological symptoms in both groups increase overtime during the first five years post-injury, after which rates appear to decline. While overall neuropsychological sequelae are statistically comparable between voltage groups, LVIs result in marginally greater rates of depressed mood, anxiety, nightmares, headaches and hypervigilance. They have similarly been associated with greater rates of PTSD, MDD, GAD, adjustment disorder and panic disorder. Lastly, both voltage groups are implicated in RTW challenges. HVIs result in marginally more frequent job accommodations and retraining, while LVIs are associated with slightly greater rates of unsuccessful RTW. However, these results are not statistically significant. Therefore, while HVIs result in increased clinical morbidity, LVIs need to be recognized as significant burdens for their effects on neuropsychological and social well-being.

Acute clinical findings are consistent with other studies that have shown increased morbidity in patients who have sustained a HVI.[19-25] A recent systematic review evaluated the different injury patterns associated with HVIs and LVIs, with combined data identifying longer hospital stays and greater complication rates with higher voltage.[19-21] Comparative data between voltage groups for other common complications implicated in EIs, such as compartment syndrome, rhabdomyolysis and amputations, are lacking in literature.[26-28] However, histological and gross structural modifications, along with subsequent muscle and vasculature destruction, have been observed with increasing voltage.[29] This further suggests that HVIs may result in increased complication rates, morbidity and mortality.[28-33]

1  
2  
3 Hussmann et al. observed greater rates of neurological impairments in their EI patient  
4 cohort, over a mean follow-up time of 5 years.[6] This suggests that our findings may  
5 underestimate the true severity of EIs, as continued care beyond 5 years was uncommon in our  
6 long-term cohort. Nevertheless, our findings are consistent with other studies that have evaluated  
7 the implications of EIs on behaviour and cognitive function.[5,6,8-10,14-16,34] Common  
8 difficulties identified during recovery include flashbacks, nightmares, MDD and PTSD. The  
9 findings of these studies highlight the need for further exploration of neuropsychological  
10 sequelae in this burn population. In doing so, we will improve the understanding of specific  
11 predispositions post-EI, facilitating symptom monitoring and management.  
12  
13  
14  
15  
16  
17  
18  
19  
20  
21  
22  
23

24 Current literature regarding neuropsychological sequelae suggests that burn survivors  
25 exhibit greater rates of psychiatric illnesses compared to the general population. Meyer et al.  
26 investigated the prevalence of diagnoses in young adults who had sustained a burn injury of any  
27 etiology prior to the age of 16.[35] Relative to our EI cohort, a lower rate of PTSD and greater  
28 incidences of MDD and GAD were reported. However, the mean follow-up time post-injury is  
29 greater than that of our study, which may result in an underestimation of diagnosis rates within  
30 our cohort. Additionally, differences in cohort characteristics exist, with the mean age of our  
31 patient population being twice as high, with a significantly greater representation of males than  
32 females. Therefore, comparison of our findings to current evidence indicates that EI patients may  
33 be more predisposed to certain psychiatric conditions relative to the general burn population.  
34  
35  
36  
37  
38  
39  
40  
41  
42  
43  
44  
45  
46

47 Lastly, our results demonstrate the challenges that EIs elicit with employment  
48 reintegration. Noble et al. found that a third of their EI cohort was unable to return to any  
49 employment.[5] In contrast, we observed a lower inability to RTW in both voltage groups. This  
50 may indicate improved strategies in EI management and more specialized rehabilitation  
51  
52  
53  
54  
55  
56  
57  
58  
59  
60

1  
2  
3 programs that enhance work reintegration. However, workplace accommodations remain  
4  
5 common amongst this burn population and should be an area of focus during rehabilitation.  
6

7  
8 This study provides a regional view into the truly global burden of this burn injury. A  
9  
10 recent review of adult EIs identified a total of 41 publications globally in this area of research.  
11  
12 Nearly half of all studies originated from outside of North American and did not independently  
13  
14 evaluate HVI and LVI outcomes. These studies limited investigations to clinical-based outcomes  
15  
16 without addressing rehabilitation and psychological impacts.[19] Therefore, to our knowledge,  
17  
18 our study is the most comprehensive acute and long-term investigation of EIs to date, providing  
19  
20 caregivers with an in-depth understanding of the acute and long-term barriers faced by this burn  
21  
22 population. These findings additionally highlight the need for employee safety education and  
23  
24 post-injury monitoring for common sequelae with any voltage.[17] Additionally, specialized care  
25  
26 centres should manage this patient population early on in treatment, with immediate involvement  
27  
28 of mental health experts. Overall, the formulation of holistic EI teams (i.e. psychologists,  
29  
30 occupational therapists, physiotherapists, pain specialists, RTW coordinators) may facilitate  
31  
32 reintegration to original employment and improve patient outcomes.  
33  
34  
35  
36

37  
38 Several limitations have been recognized. Data from the acute period was extracted from  
39  
40 a single regional burn centre. Therefore, our cohorts consist of patients believed to be more  
41  
42 injured than other EI patients, requiring specialized treatment. Long-term data is limited to  
43  
44 patients who received rehabilitation services at *SJRH*. Patients may have sought treatment within  
45  
46 their community, limiting identification of more long-term sequelae. Due to this loss to follow-  
47  
48 up, our results may underrepresent the long-term neuropsychological and RTW effects of EIs.  
49  
50 Furthermore, our study did not incorporate a control group, limiting our ability of identifying  
51  
52 definitive causal relationships between EIs and neuropsychological sequelae. Lastly,  
53  
54 LOS/%TBSA is a commonly used parameter in burns, however, it is not as reflective of EI-  
55  
56  
57  
58  
59  
60

1  
2  
3 associated damage, as the effects on underlying tissues are profound but not accounted for in  
4  
5 %TBSA. Therefore, it has served as a minor outcome measure for this study.  
6

7  
8 In conclusion, EIs are implicated in multifaceted clinical, neuropsychological and social  
9  
10 sequelae. Effects exist acutely and long-term, warranting monitoring that extends beyond initial  
11  
12 treatment. LVIs are, at minimum, as likely as HVIs of exhibiting complications during recovery.  
13  
14 Lastly, we have identified these effects as possible barriers for successful employment  
15  
16 reintegration. Collectively, these findings indicate a need for focused training and rehabilitation.  
17  
18 Future investigations will involve implementing similar studies across broad geographic regions  
19  
20 to inform region-specific management of this burn injury.  
21  
22  
23  
24  
25  
26  
27  
28  
29  
30  
31  
32  
33  
34  
35  
36  
37  
38  
39  
40  
41  
42  
43  
44  
45  
46  
47  
48  
49  
50  
51  
52  
53  
54  
55  
56  
57  
58  
59  
60

**ACKNOWLEDGEMENTS**

None.

**FUNDING STATEMENT**

This work is supported by grants from the National Institutes of Health (R01 GM087285-01); CIHR Funds (123336), CFI Leader's Opportunity Fund (Project #25407). Additionally, this work was generously supported by Alectra Inc., Electrical Safety Authority, Hydro One, Ontario Energy Network, Ontario Power Generation, Power Workers Union and Toronto Hydro.

**COMPETING INTERESTS STATEMENT**

None declared.

**AUTHOR CONTRIBUTIONS**

MGJ was responsible for the study design. NR was responsible for the literature search, data acquisition and drafting of the work. SR and NR conducted statistical analysis of data. NR, SAM, SR, MG and MGJ were responsible for revisions of the work. All authors gave approval for the final version of the manuscript.

**DATA SHARING STATEMENT**

No additional data from this study are available.

**REFERENCES**

1. American Burn Association. National Burn Repository: 2016 Report.  
<http://ameriburn.org/education/publications/> Published 2016. Accessed June, 2017.
2. Mancusi-Ungaro HR Jr, Tarbox AR, Wainwright DJ. Posttraumatic stress disorder in electric burn patients. *J Burn Care Rehabil.* 1986;7:521–525.
3. Inancsi W, Guidotti TL. Occupation-related burns: five-year experience of an urban burn center. *J Occup Med.* 1987;29(9):730-733.
4. Mandelcorn E, Gomez M, Cartotto RC. Work-related burn injuries in Ontario, Canada: has anything changed in the last 10 years? *Burns.* 2003;29(5):469-472.
5. Noble J, Gomez M, Fish JS. Quality of life and return to work following electrical burns. *Burns.* 2006;32(2):159-164.
6. Hussmann J, Kucan JO, Russell RC, et al. Electrical injuries—morbidity, outcome and treatment rationale. *Burns.* 1995;21:530–535.
7. Janus TJ, Barrash J. Neurologic and neurobehavioral effects of electric and lightning injuries. *J Burn Care Rehabil.* 1996;17:409–415.
8. Pliskin NH, Capelli-Schellpfeffer M, Law RT, et al. Neuropsychological symptom presentation after electrical injury. *J Trauma.* 1998;44:709–715.
9. Kelley KM, Tkachenko TA, Pliskin NH, et al. Life after electrical injury—risk factors for psychiatric sequelae. *Ann N Y Acad Sci.* 1999;888:356-363.
10. Pliskin NH, Fink JW, Malina A, et al. The neuropsychological effects of electrical injury: new insights. *Ann NY Acad Sci.* 1999;888:140–149.
11. Muehlberger T, Vogt PM, Munster AM. The long-term consequences of lightning injuries. *Burns.* 2001;27(8):829-833.
12. Martin TA, Salvatore NF, Johnstone B. Cognitive decline over time following electrical

- injury. *Brain Inj.* 2003;17(9):817-823.
13. Pliskin NH, Ammar AN, Fink JW, et al. Neuropsychological changes following electrical injury. *J Int Neuropsychol Soc.* 2006;12:17–23.
14. Ramati A, Rubin LH, Wicklund A, et al. Psychiatric morbidity following electrical injury and its effects on cognitive functioning. *Gen Hosp Psychiatry.* 2009;31(4):360-366.
15. Chudasama S, Goverman J, Donaldson JH, et al. Does voltage predict return to work and neuropsychiatric sequelae following electrical burn injury? *Ann Plast Surg.* 2010;64(5):522-525.
16. Piotrowski A, Fillet AM, Perez P, et al. Outcome of occupational electrical injuries among French electric company workers: a retrospective report of 311 cases, 1996-2005. *Burns.* 2014;40(3):480-488.
17. Waldmann et al, 2018. Electrical cardiac injuries: current concepts and management. *Eur Heart J.* 2018;39(16):1459-1465.
18. International Electrotechnical Commission. International standard: IEC standard voltages. IEC 60038:1983+A1:1994+A2:1997(E).
19. Shih JG, Shahrokhi S, Jeschke MG. Review of Adult Electrical Burn Injury Outcomes Worldwide: An Analysis of Low-Voltage vs. High Voltage Electrical Injury. *J Burn Care Res.* 2017;38(1):e293-e298.
20. Latifi N, Karimi H. Acute electrical injury: A systematic review. *J Acute Dis.* 2017;6(3):93-96.
21. Karimi H, Momeni M, Vasigh M. Long term outcome and follow up of electrical injury. *J Acute Dis.* 2015;4(2):107-111.
22. Grube BJ, Heimback DM, Engrav LH, et al. Neurologic consequences of electrical burns. *J Trauma.* 1990;30(3):254-258.



- 1  
2  
3 23. Luz DP, Millan LS, Alessi MS et al. Electrical burns: a retrospective analysis across a 5-year  
4 period. *Burns*. 2009;35(7):1015-1019.  
5  
6  
7 24. Gündüz T, Elçioğlu O, Cetin C. Intensity and localization of trauma in non-fatal electrical  
8 injuries. *Ulus Travma Acil Cerrahi Derg*. 2010;16(3):237-240.  
9  
10 25. Karadas S, Gonullu H, Oncu MR, et al. The effects on complications and myopathy of  
11 different voltages in electrical injuries. *Ulus Travma Acil Cerrahi Derg*. 2011;17(4):349-353.  
12  
13 26. Holliman CJ, Saffle JR, Kravitz M, et al. Early surgical decompression in the management of  
14 electrical injuries. *Am J Surg*. 1982;144:133.  
15  
16 27. Advanced trauma life support program for physicians, Student and Instructor  
17 Manual. American College of Surgeons, Chicago; 1997.  
18  
19 28. Price TG, Cooper MA. Electrical and lightning injuries. In: Marx JA, Hockberger RS, Walls  
20 RM, et al., eds. *Rosen's Emergency Medicine: Concepts and Clinical Practice*. 8<sup>th</sup> ed.  
21 Philadelphia, PA: Elsevier Mosby; 2014: Chapter 142.  
22  
23 29. Waldmann V, Narayanan K, Combes N, Marijon E. Electrical Injury. *BMJ*. 2017;357:j1418.  
24  
25 30. Jaffe RH. Electropathology: a review of the pathologic changes produced by electric  
26 currents. *Arch Pathol*. 1928;5:839.  
27  
28 31. Kobernick M. Electrical injuries: pathophysiology and emergency management. *Ann Emerg*  
29 *Med*. 1982;11:633.  
30  
31 32. Puschel K, Brinkman B, Lieske K. Ultrastructural alteration of skeletal muscles after  
32 electrical shock. *Am J Forensic Med Pathol*. 1985;6:246.  
33  
34 33. Bongard O, Fagrell B. Delayed arterial thrombosis following an apparently trivial low-  
35 voltage electrical injury. *Vasa*. 1989;18:162.  
36  
37 34. Rosenberg M, Mehta N, Rosenberg L, et al. Immediate and long-term psychological  
38 problems for survivors of severe pediatric electrical injury. *Burns*. 2015;41(8):1823-1830.  
39  
40  
41  
42  
43  
44  
45  
46  
47  
48  
49  
50  
51  
52  
53  
54  
55  
56  
57  
58  
59  
60

- 1  
2  
3 35. Meyer WJ, Blakeney P, Thomas CR, et al. Prevalence of Major Psychiatric Illness in Young  
4  
5 Adults Who Were Burned as Children. *Psychosom Med.* 2007;69:377-382.  
6  
7  
8  
9  
10  
11  
12  
13  
14  
15  
16  
17  
18  
19  
20  
21  
22  
23  
24  
25  
26  
27  
28  
29  
30  
31  
32  
33  
34  
35  
36  
37  
38  
39  
40  
41  
42  
43  
44  
45  
46

#### 47 **Figure Legends**

- 48  
49 ● **Figure 1. Neuropsychological symptoms of EI patients during the acute phase of**  
50 **treatment.** Abbreviations: HVI, high-voltage injury; LVI, low-voltage injury.  
51  
52  
53  
54 ● **Figure 2. Neuropsychological symptoms of EI patients during the long-term phase**  
55 **of treatment.** Abbreviations: HVI, high-voltage injury; LVI, low-voltage injury.  
56  
57  
58  
59  
60

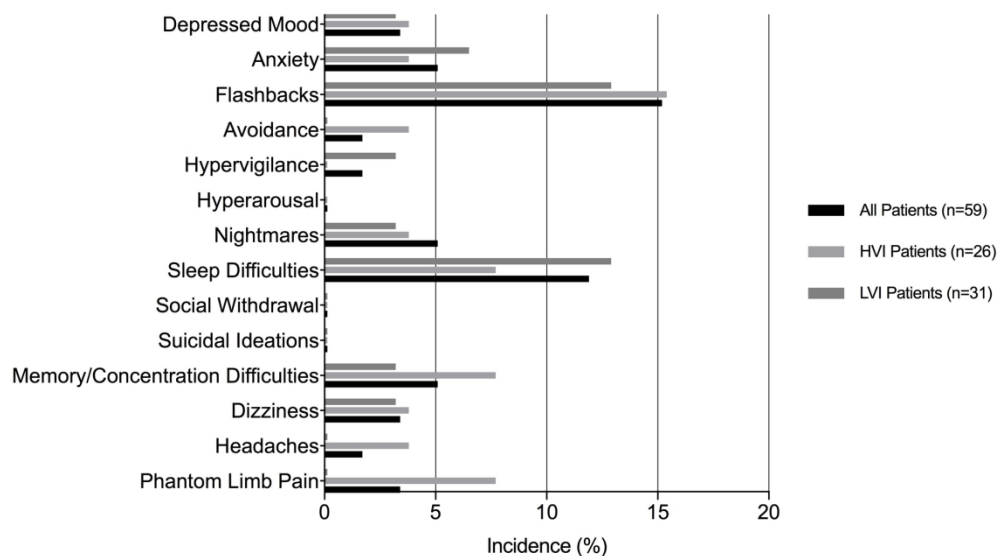

Figure 1. Neuropsychological symptoms of EI patients during the acute phase of treatment. Abbreviations: HVI, high-voltage injury; LVI, low-voltage injury.

90x51mm (600 x 600 DPI)

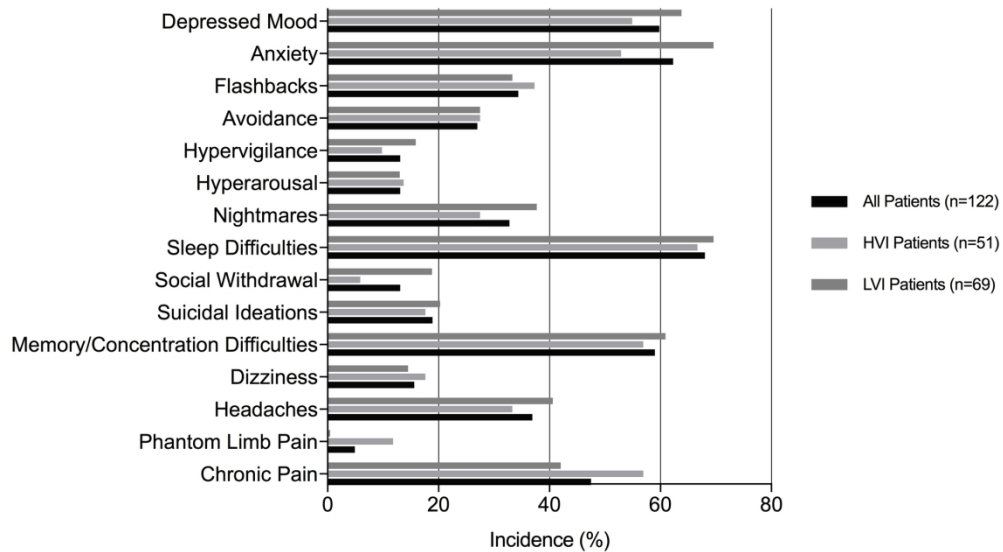

Figure 2. Neuropsychological symptoms of EI patients during the long-term phase of treatment. Abbreviations: HVI, high-voltage injury; LVI, low-voltage injury.

90x51mm (600 x 600 DPI)

## Supplementary Online Content

**Supplementary Figure 1.** Patient flow diagram.

**Supplementary Figure 2.** Annual admissions of acute electrical injuries at the *Ross Tilley Burn Centre*, Toronto, Canada.

**Supplementary Figure 3.** Kaplan-Meier Survival Curve.

**Supplementary Figure 4.** Rates of psychiatric diagnoses among the long-term cohort.

**Supplementary Table 1.** Demographics and injury characteristics of patients treated acutely at the burn centre.

**Supplementary Table 2.** Demographics and injury characteristics of the long-term cohort.

**Supplementary Table 3.** Time to diagnosis (from day of injury) of psychiatric conditions during the long-term period of treatment.

**Supplementary Table 4.** Rates of neuropsychological symptoms in patients formally diagnosed with a psychiatric condition in the long-term cohort.

**Supplementary Figure 1. Patient Flow Diagram.** Abbreviations: RTBC, Ross Tilley Burn Centre; SJRH, St. John's Rehabilitation Hospital; RTW, return-to-work.

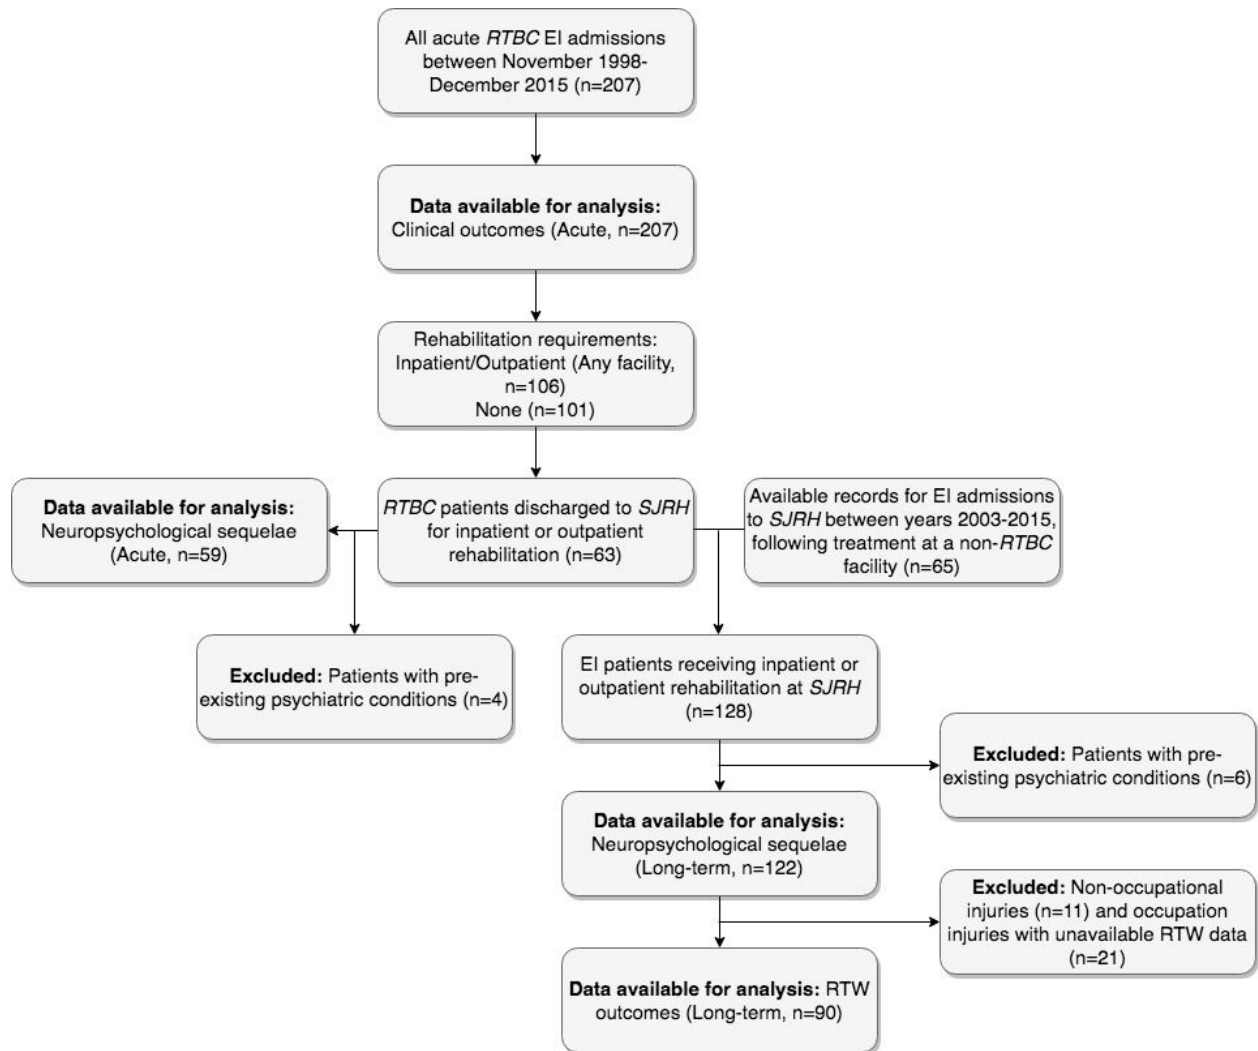

**Supplementary Figure 2. Annual admissions of acute electrical injuries at the Ross Tilley Burn Centre, Toronto, Canada.** A total of 9 admissions were of unknown voltage. Abbreviations: HVI, high-voltage injury; LVI, low-voltage injury.

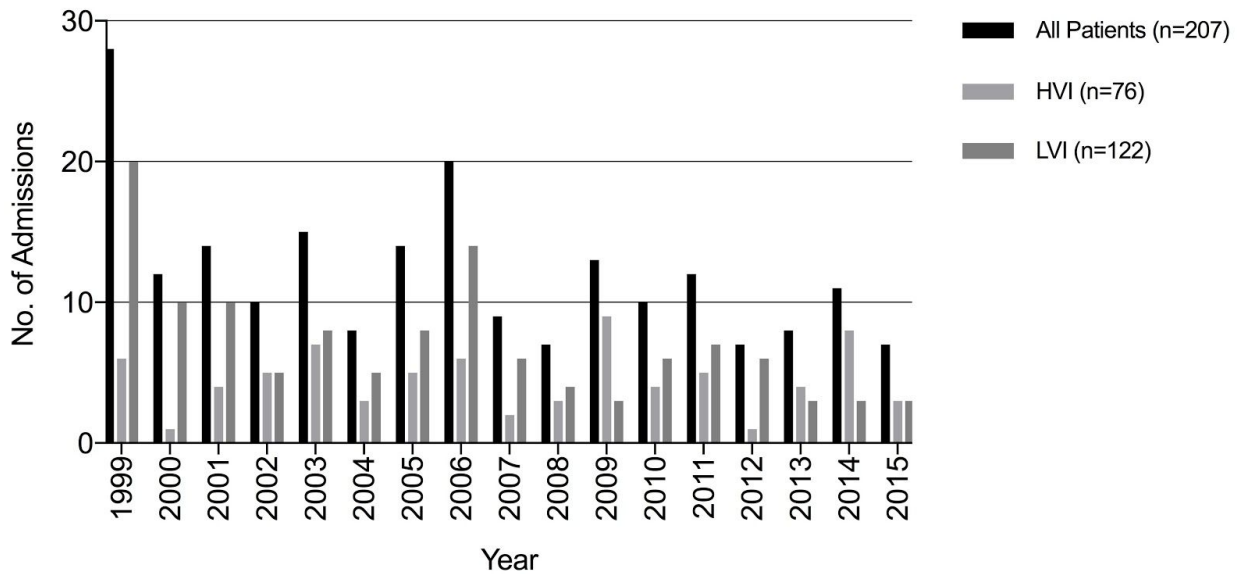

**Supplementary Figure 3. Kaplan-Meier Survival Curve.** Abbreviations: HVI, high-voltage injury; LVI, low-voltage injury;

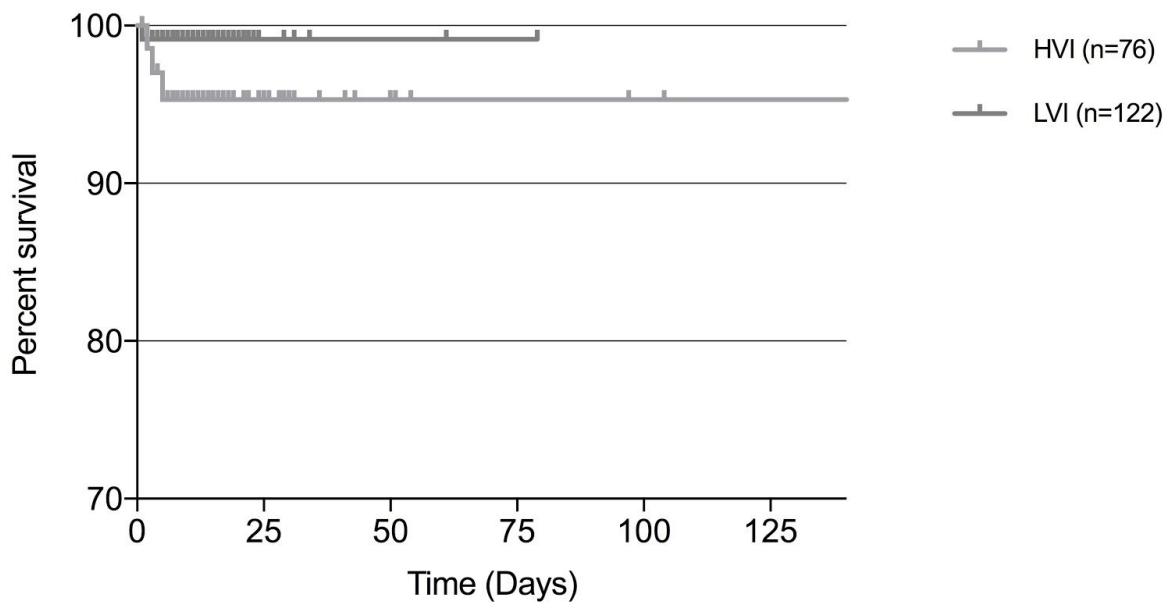

| No. at risk | 0   | 25 | 50 | 75 | 100 | 125 |
|-------------|-----|----|----|----|-----|-----|
| HVI:        | 76  | 18 | 7  | 3  | 2   | 1   |
| LVI:        | 117 | 5  | 2  | 1  | 0   | 0   |

### Supplementary Figure 4. Rates of psychiatric diagnoses among the long-term cohort.

Abbreviations: HVI, high-voltage injury; LVI, low-voltage injury; PTSD, post-traumatic stress disorder; MDD, major depressive disorder; GAD, generalized anxiety disorder; AD, adjustment disorder; PD, panic disorder.

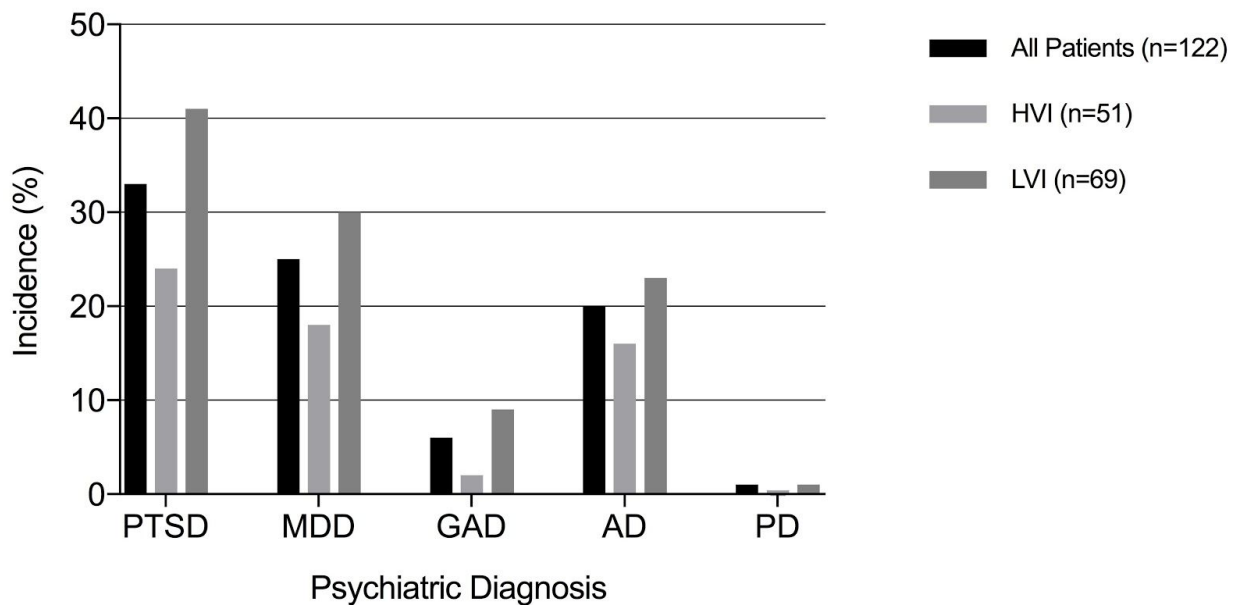

### Supplementary Table 1. Demographics and injury characteristics of patients treated acutely at the burn centre.

|                            | All Patients <sup>a</sup> | HVI     | LVI      | <i>P</i> |
|----------------------------|---------------------------|---------|----------|----------|
| No. of patients            | 207                       | 76      | 122      |          |
| Age, years, mean (SD)      | 41 (13)                   | 40 (14) | 41 (13)  | 0.64     |
| Male, no. (%)              | 198 (96)                  | 72 (95) | 117 (96) | 0.74     |
| TBSA, %, mean (SD)         | 8 (12)                    | 10 (13) | 8 (11)   | 0.17     |
| Inhalation injury, no. (%) | 4 (2)                     | 1 (1)   | 3 (3)    | >.99     |
| Work-Related, no. (%)      | 171 (83)                  | 57 (75) | 107 (88) | .03      |
| Classification, no. (%)    |                           |         |          |          |
| Contact                    | 67 (33)                   | 11 (15) | 18 (15)  | >.99     |
| Flash                      | 115 (56)                  | 10 (13) | 101 (83) | <.001    |
| Contact and Flash          | 15 (7)                    | 46 (61) | 3 (3)    | <.001    |
| Lightning                  | 4 (2)                     | 4 (5)   | 0 (0)    | .02      |
| Unspecified                | 6 (3)                     | 5 (7)   | 0 (0)    | .008     |

Abbreviations: HVI, high-voltage injury; LVI, low-voltage injury; TBSA, total body surface area.  
<sup>a</sup>Includes patients whose voltage was not otherwise specified (n=9).



**Supplementary Table 2. Demographics and injury characteristics of the long-term cohort.**

|                                | All Patients <sup>a</sup> | HVI     | LVI     | P     |
|--------------------------------|---------------------------|---------|---------|-------|
| No. of patients                | 122                       | 51      | 69      |       |
| Work-Related, no. (%)          | 111 (91)                  | 47 (92) | 62 (90) | >.99  |
| Available RTW data, no. (%)    | 90 (81)                   | 39 (83) | 49 (79) | .54   |
| Pre-Injury Occupation, no. (%) |                           |         |         |       |
| Electrician                    | 26 (29)                   | 6 (15)  | 19 (39) | .02   |
| Mechanic                       | 3 (3)                     | 0 (0)   | 3 (6)   | .25   |
| Maintenance Worker             | 4 (4)                     | 0 (0)   | 4 (8)   | .13   |
| Powerline Technician           | 13 (14)                   | 13 (33) | 0 (0)   | <.001 |
| Construction Worker            | 4 (4)                     | 4 (10)  | 0 (0)   | .04   |
| Self-Employed                  | 2 (2)                     | 2 (5)   | 0 (0)   | .19   |
| Truck Driver                   | 3 (3)                     | 3 (8)   | 0 (0)   | .08   |
| Other                          | 29 (32)                   | 8 (21)  | 21 (43) | .04   |
| Unknown                        | 6 (7)                     | 3 (8)   | 2 (4)   | .65   |

Abbreviations: HVI, high-voltage injury; LVI, low-voltage injury; RTW, return-to-work.  
 Analysis excludes patients with documented pre-existing psychiatric conditions.  
<sup>a</sup> Includes patients whose voltage was not otherwise specified (n=2).

**Supplementary Table 3. Time to diagnosis (from day of injury) of psychiatric conditions during the long-term period of treatment.**

|                                                             | All Patients   | HVI            | LVI            | P   |
|-------------------------------------------------------------|----------------|----------------|----------------|-----|
| All Conditions (n=101), days, median (IQR) <sup>a,b</sup>   | 315 (117-957)  | 384 (161-1461) | 272 (114-904)  | .20 |
| PTSD (n=40), days, median (IQR)                             | 263 (78-937)   | 325 (153-1495) | 253 (75-843)   | .41 |
| MDD (n=30), days, median (IQR)                              | 531 (213-1061) | 684 (265-1897) | 402 (151-1013) | .33 |
| GAD (n=7), days, median (IQR)                               | 402 (261-1060) | -              | 374 (252-891)  | -   |
| Adjustment Disorder (n=23), days, median (IQR) <sup>b</sup> | 177 (88-771)   | 177 (63-1042)  | 177 (99-358)   | .82 |
| Panic Disorder (n=1), days, median (IQR)                    | -              | -              | -              | -   |

Abbreviations: HVI, high-voltage injury; LVI, low-voltage injury; PTSD, post-traumatic stress disorder; MDD, major depressive disorder; GAD, generalized anxiety disorder.  
 Analysis excludes patients with documented pre-existing psychiatric conditions.  
<sup>a</sup> Conditions include PTSD, MDD, GAD, adjustment disorder and panic disorder.  
<sup>b</sup> Patients without documented diagnoses dates were excluded from analysis (n=1).

**Supplementary Table 4. Rates of neuropsychological symptoms in patients formally diagnosed with a psychiatric condition in the long-term cohort.**

|                                            | PTSD    | MDD     | GAD     | Adjustment Disorder | Panic Disorder |
|--------------------------------------------|---------|---------|---------|---------------------|----------------|
| No. of patients                            | 40      | 30      | 7       | 24                  | 1              |
| Depressed Mood, no. (%)                    | 34 (85) | 29 (97) | 7 (100) | 24 (100)            | 1 (100)        |
| Anxiety, no. (%)                           | 38 (95) | 28 (93) | 7 (100) | 21 (88)             | 1 (100)        |
| Flashbacks, no. (%)                        | 23 (58) | 13 (43) | 2 (29)  | 13 (54)             | 1 (100)        |
| Avoidance, no. (%)                         | 17 (43) | 15 (50) | 4 (57)  | 10 (42)             | 1 (100)        |
| Hypervigilance, no. (%)                    | 8 (20)  | 9 (30)  | 1 (14)  | 2 (8)               | 0 (0)          |
| Hyperarousal, no. (%)                      | 13 (33) | 8 (27)  | 1 (14)  | 5 (21)              | 1 (100)        |
| Nightmares, no. (%)                        | 21 (53) | 16 (53) | 6 (86)  | 14 (58)             | 0 (0)          |
| Sleep Difficulties, no. (%)                | 37 (93) | 28 (93) | 7 (100) | 22 (92)             | 1 (100)        |
| Social Withdrawal, no. (%)                 | 10 (25) | 8 (27)  | 2 (29)  | 4 (17)              | 0 (0)          |
| Suicidal Ideations, no. (%)                | 18 (45) | 15 (50) | 4 (57)  | 9 (38)              | 1 (100)        |
| Memory/Concentration Difficulties, no. (%) | 33 (83) | 29 (97) | 7 (100) | 21 (88)             | 1 (100)        |
| Dizziness, no. (%)                         | 7 (18)  | 7 (23)  | 2 (29)  | 7 (29)              | 0 (0)          |
| Headaches, no. (%)                         | 19 (48) | 15 (50) | 4 (57)  | 17 (71)             | 0 (0)          |
| Phantom Limb Pain, no. (%)                 | 2 (5)   | 2 (7)   | 1 (14)  | 1 (4)               | 0 (0)          |
| Chronic Pain, no. (%)                      | 24 (60) | 23 (77) | 3 (43)  | 16 (67)             | 0 (0)          |

Abbreviations: PTSD, post-traumatic stress disorder; MDD, major depressive disorder; GAD, generalized anxiety disorder. Analysis excludes patients with documented pre-existing psychiatric conditions.

# Reporting checklist for cohort study.

Based on the STROBE cohort guidelines.

## Instructions to authors

Complete this checklist by entering the page numbers from your manuscript where readers will find each of the items listed below.

Your article may not currently address all the items on the checklist. Please modify your text to include the missing information. If you are certain that an item does not apply, please write "n/a" and provide a short explanation.

Upload your completed checklist as an extra file when you submit to a journal.

In your methods section, say that you used the STROBE cohort reporting guidelines, and cite them as:

von Elm E, Altman DG, Egger M, Pocock SJ, Gøtzsche PC, Vandenbroucke JP. The Strengthening the Reporting of Observational Studies in Epidemiology (STROBE) Statement: guidelines for reporting observational studies.

|                        |     | Reporting Item                                                                                                                  | Page Number |
|------------------------|-----|---------------------------------------------------------------------------------------------------------------------------------|-------------|
| Title                  | #1a | Indicate the study's design with a commonly used term in the title or the abstract                                              | 3           |
| Abstract               | #1b | Provide in the abstract an informative and balanced summary of what was done and what was found                                 | 4-5         |
| Background / rationale | #2  | Explain the scientific background and rationale for the investigation being reported                                            | 7           |
| Objectives             | #3  | State specific objectives, including any prespecified hypotheses                                                                | 8           |
| Study design           | #4  | Present key elements of study design early in the paper                                                                         | 9           |
| Setting                | #5  | Describe the setting, locations, and relevant dates, including periods of recruitment, exposure, follow-up, and data collection | 9           |
| Eligibility criteria   | #6a | Give the eligibility criteria, and the sources and methods of selection of participants. Describe methods of follow-up.         | 9           |

|    |                |      |                                                                   |          |
|----|----------------|------|-------------------------------------------------------------------|----------|
| 1  |                | #6b  | For matched studies, give matching criteria and number of         | See note |
| 2  |                |      | exposed and unexposed                                             | 1        |
| 3  |                |      |                                                                   |          |
| 4  | Variables      | #7   | Clearly define all outcomes, exposures, predictors, potential     | 9-10     |
| 5  |                |      | confounders, and effect modifiers. Give diagnostic criteria, if   |          |
| 6  |                |      | applicable                                                        |          |
| 7  |                |      |                                                                   |          |
| 8  |                |      |                                                                   |          |
| 9  |                |      |                                                                   |          |
| 10 | Data sources / | #8   | For each variable of interest give sources of data and details of | 9-10     |
| 11 | measurement    |      | methods of assessment (measurement). Describe                     |          |
| 12 |                |      | comparability of assessment methods if there is more than one     |          |
| 13 |                |      | group. Give information separately for for exposed and            |          |
| 14 |                |      | unexposed groups if applicable.                                   |          |
| 15 |                |      |                                                                   |          |
| 16 |                |      |                                                                   |          |
| 17 |                |      |                                                                   |          |
| 18 | Bias           | #9   | Describe any efforts to address potential sources of bias         | See note |
| 19 |                |      |                                                                   | 2        |
| 20 |                |      |                                                                   |          |
| 21 |                |      |                                                                   |          |
| 22 | Study size     | #10  | Explain how the study size was arrived at                         | 9        |
| 23 |                |      |                                                                   |          |
| 24 | Quantitative   | #11  | Explain how quantitative variables were handled in the            | 9        |
| 25 | variables      |      | analyses. If applicable, describe which groupings were chosen,    |          |
| 26 |                |      | and why                                                           |          |
| 27 |                |      |                                                                   |          |
| 28 |                |      |                                                                   |          |
| 29 |                |      |                                                                   |          |
| 30 | Statistical    | #12a | Describe all statistical methods, including those used to control | 11       |
| 31 | methods        |      | for confounding                                                   |          |
| 32 |                |      |                                                                   |          |
| 33 |                |      |                                                                   |          |
| 34 |                | #12b | Describe any methods used to examine subgroups and                | 11       |
| 35 |                |      | interactions                                                      |          |
| 36 |                |      |                                                                   |          |
| 37 |                |      |                                                                   |          |
| 38 |                | #12c | Explain how missing data were addressed                           | 12       |
| 39 |                |      |                                                                   |          |
| 40 |                | #12d | If applicable, explain how loss to follow-up was addressed        | n/a      |
| 41 |                |      |                                                                   |          |
| 42 |                | #12e | Describe any sensitivity analyses                                 | See note |
| 43 |                |      |                                                                   | 3        |
| 44 |                |      |                                                                   |          |
| 45 |                |      |                                                                   |          |
| 46 | Participants   | #13a | Report numbers of individuals at each stage of study—eg           | 12-15    |
| 47 |                |      | numbers potentially eligible, examined for eligibility, confirmed |          |
| 48 |                |      | eligible, included in the study, completing follow-up, and        |          |
| 49 |                |      | analysed. Give information separately for for exposed and         |          |
| 50 |                |      | unexposed groups if applicable.                                   |          |
| 51 |                |      |                                                                   |          |
| 52 |                |      |                                                                   |          |
| 53 |                |      |                                                                   |          |
| 54 |                | #13b | Give reasons for non-participation at each stage                  | 12-15    |
| 55 |                |      |                                                                   |          |
| 56 |                |      |                                                                   |          |
| 57 |                | #13c | Consider use of a flow diagram                                    | 9        |
| 58 |                |      |                                                                   |          |
| 59 |                |      |                                                                   |          |
| 60 |                |      |                                                                   |          |

|    |                  |      |                                                                                                                                                                                                                   |               |
|----|------------------|------|-------------------------------------------------------------------------------------------------------------------------------------------------------------------------------------------------------------------|---------------|
| 1  | Descriptive data | #14a | Give characteristics of study participants (eg demographic, clinical, social) and information on exposures and potential confounders. Give information separately for exposed and unexposed groups if applicable. | 12-15         |
| 2  |                  |      |                                                                                                                                                                                                                   |               |
| 3  |                  |      |                                                                                                                                                                                                                   |               |
| 4  |                  |      |                                                                                                                                                                                                                   |               |
| 5  |                  |      |                                                                                                                                                                                                                   |               |
| 6  |                  |      |                                                                                                                                                                                                                   |               |
| 7  |                  |      |                                                                                                                                                                                                                   |               |
| 8  |                  | #14b | Indicate number of participants with missing data for each variable of interest                                                                                                                                   | 12-15         |
| 9  |                  |      |                                                                                                                                                                                                                   |               |
| 10 |                  |      |                                                                                                                                                                                                                   |               |
| 11 |                  | #14c | Summarise follow-up time (eg, average and total amount)                                                                                                                                                           | 16            |
| 12 |                  |      |                                                                                                                                                                                                                   |               |
| 13 |                  |      |                                                                                                                                                                                                                   |               |
| 14 | Outcome data     | #15  | Report numbers of outcome events or summary measures over time. Give information separately for exposed and unexposed groups if applicable.                                                                       | 12-18         |
| 15 |                  |      |                                                                                                                                                                                                                   |               |
| 16 |                  |      |                                                                                                                                                                                                                   |               |
| 17 |                  |      |                                                                                                                                                                                                                   |               |
| 18 |                  |      |                                                                                                                                                                                                                   |               |
| 19 | Main results     | #16a | Give unadjusted estimates and, if applicable, confounder-adjusted estimates and their precision (eg, 95% confidence interval). Make clear which confounders were adjusted for and why they were included          | 12-18         |
| 20 |                  |      |                                                                                                                                                                                                                   |               |
| 21 |                  |      |                                                                                                                                                                                                                   |               |
| 22 |                  | #16b | Report category boundaries when continuous variables were categorized                                                                                                                                             | 12-18         |
| 23 |                  |      |                                                                                                                                                                                                                   |               |
| 24 |                  |      |                                                                                                                                                                                                                   |               |
| 25 |                  |      |                                                                                                                                                                                                                   |               |
| 26 |                  | #16c | If relevant, consider translating estimates of relative risk into absolute risk for a meaningful time period                                                                                                      | See note<br>4 |
| 27 |                  |      |                                                                                                                                                                                                                   |               |
| 28 |                  |      |                                                                                                                                                                                                                   |               |
| 29 |                  |      |                                                                                                                                                                                                                   |               |
| 30 | Other analyses   | #17  | Report other analyses done—e.g., analyses of subgroups and interactions, and sensitivity analyses                                                                                                                 | 12-18         |
| 31 |                  |      |                                                                                                                                                                                                                   |               |
| 32 |                  |      |                                                                                                                                                                                                                   |               |
| 33 |                  |      |                                                                                                                                                                                                                   |               |
| 34 | Key results      | #18  | Summarise key results with reference to study objectives                                                                                                                                                          | 19            |
| 35 |                  |      |                                                                                                                                                                                                                   |               |
| 36 |                  |      |                                                                                                                                                                                                                   |               |
| 37 | Limitations      | #19  | Discuss limitations of the study, taking into account sources of potential bias or imprecision. Discuss both direction and magnitude of any potential bias.                                                       | 21            |
| 38 |                  |      |                                                                                                                                                                                                                   |               |
| 39 |                  |      |                                                                                                                                                                                                                   |               |
| 40 | Interpretation   | #20  | Give a cautious overall interpretation considering objectives, limitations, multiplicity of analyses, results from similar studies, and other relevant evidence.                                                  | 21-22         |
| 41 |                  |      |                                                                                                                                                                                                                   |               |
| 42 |                  |      |                                                                                                                                                                                                                   |               |
| 43 |                  |      |                                                                                                                                                                                                                   |               |
| 44 |                  |      |                                                                                                                                                                                                                   |               |
| 45 | Generalisability | #21  | Discuss the generalisability (external validity) of the study results                                                                                                                                             | 21-22         |
| 46 |                  |      |                                                                                                                                                                                                                   |               |
| 47 |                  |      |                                                                                                                                                                                                                   |               |
| 48 |                  |      |                                                                                                                                                                                                                   |               |
| 49 | Funding          | #22  | Give the source of funding and the role of the funders for the present study and, if applicable, for the original study on which the present article is based                                                     | 23            |
| 50 |                  |      |                                                                                                                                                                                                                   |               |
| 51 |                  |      |                                                                                                                                                                                                                   |               |
| 52 |                  |      |                                                                                                                                                                                                                   |               |
| 53 |                  |      |                                                                                                                                                                                                                   |               |
| 54 |                  |      |                                                                                                                                                                                                                   |               |
| 55 |                  |      |                                                                                                                                                                                                                   |               |
| 56 |                  |      |                                                                                                                                                                                                                   |               |
| 57 |                  |      |                                                                                                                                                                                                                   |               |
| 58 |                  |      |                                                                                                                                                                                                                   |               |
| 59 |                  |      |                                                                                                                                                                                                                   |               |
| 60 |                  |      |                                                                                                                                                                                                                   |               |

## Author notes

1. n/a - this was not a matched study
2. n/a - we were unable to account for two of the biases that affected our study (discussed on pg. 21)
3. n/a - our methods did not employ any sensitivity analyses
4. n/a - was not relevant to our study

The STROBE checklist is distributed under the terms of the Creative Commons Attribution License CC-BY. This checklist was completed on 11. August 2018 using <http://www.goodreports.org/>, a tool made by the [EQUATOR Network](#) in collaboration with [Penelope.ai](#)
