# Supplementary material for: Acute and long-term clinical, neuropsychological and return-to-work sequelae following electrical injury: a retrospective cohort study
Source: PubMed Central journal article supplement — BMJ Open. 2019 May 14;9(5):e025990. doi: 10.1136/bmjopen-2018-025990 (PMC6530314; doi:10.1136/bmjopen-2018-025990), 2019-05-14
Supplement: bmjopen-2018-025990supp001.pdf [file bmjopen-2018-025990supp001.pdf]

## Supplementary Online Content

**Supplementary Figure 1.** Patient flow diagram.

**Supplementary Figure 2.** Annual admissions of acute electrical injuries at the *Ross Tilley Burn Centre*, Toronto, Canada.

**Supplementary Figure 3.** Kaplan-Meier Survival Curve.

**Supplementary Figure 4.** Rates of psychiatric diagnoses among the long-term cohort.

**Supplementary Table 1.** Demographics and injury characteristics of patients treated acutely at the burn centre.

**Supplementary Table 2.** Demographics and injury characteristics of the long-term cohort.

**Supplementary Table 3.** Time to diagnosis (from day of injury) of psychiatric conditions during the long-term period of treatment.

**Supplementary Table 4.** Rates of neuropsychological symptoms in patients formally diagnosed with a psychiatric condition in the long-term cohort.

**Supplementary Figure 1. Patient Flow Diagram.** Abbreviations: RTBC, Ross Tilley Burn Centre; SJRH, St. John’s Rehabilitation Hospital; RTW, return-to-work.

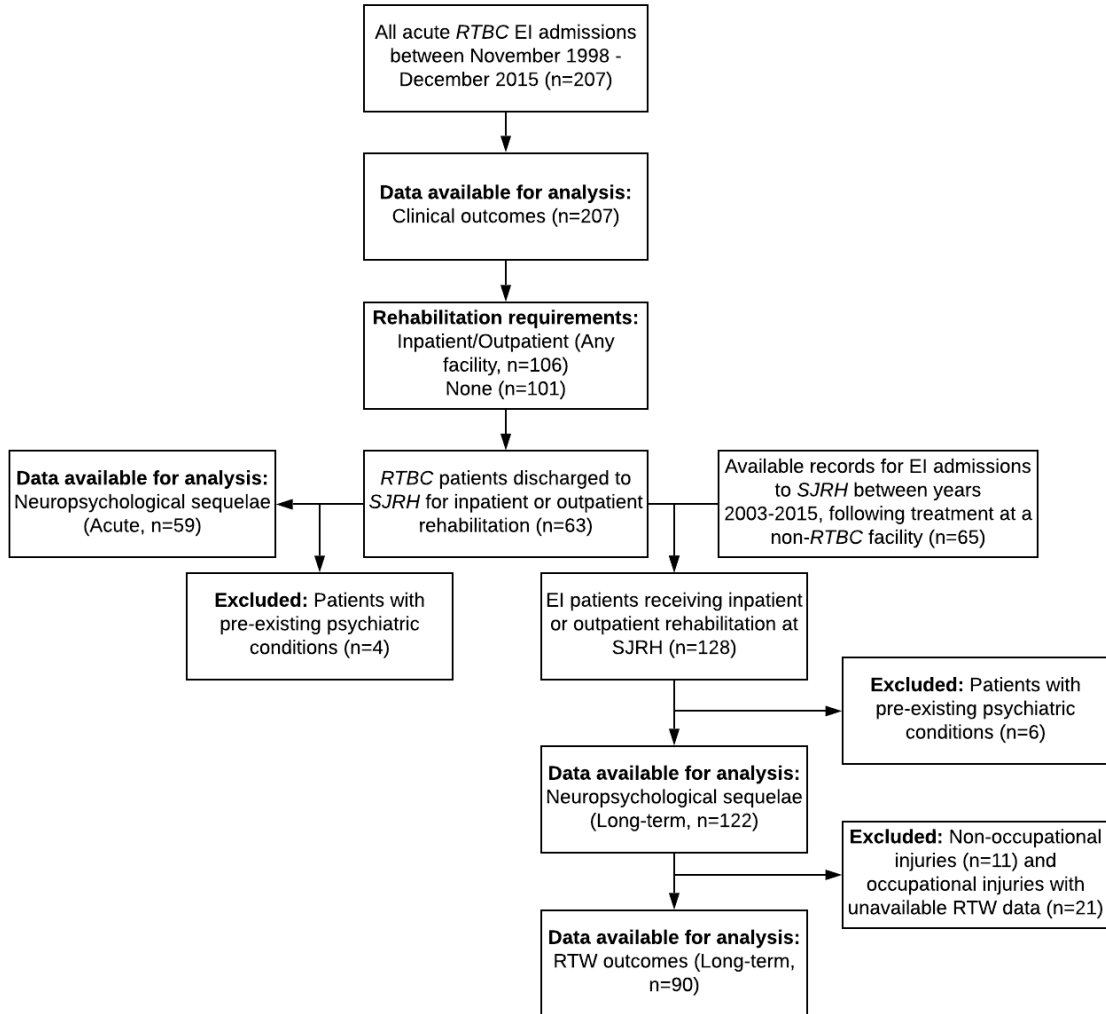

**Supplementary Figure 2. Annual admissions of acute electrical injuries at the Ross Tilley Burn Centre, Toronto, Canada.** A total of 9 admissions were of unknown voltage. Abbreviations: HVI, high-voltage injury; LVI, low-voltage injury.

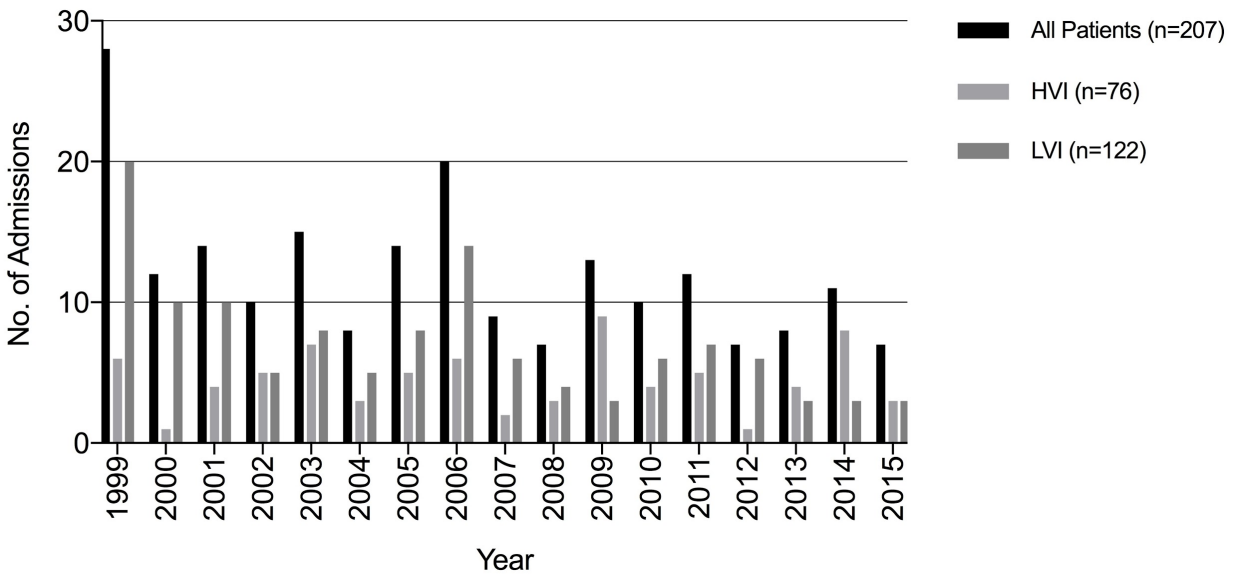

**Supplementary Figure 3. Kaplan-Meier Survival Curve.** Abbreviations: HVI, high-voltage injury; LVI, low-voltage injury;

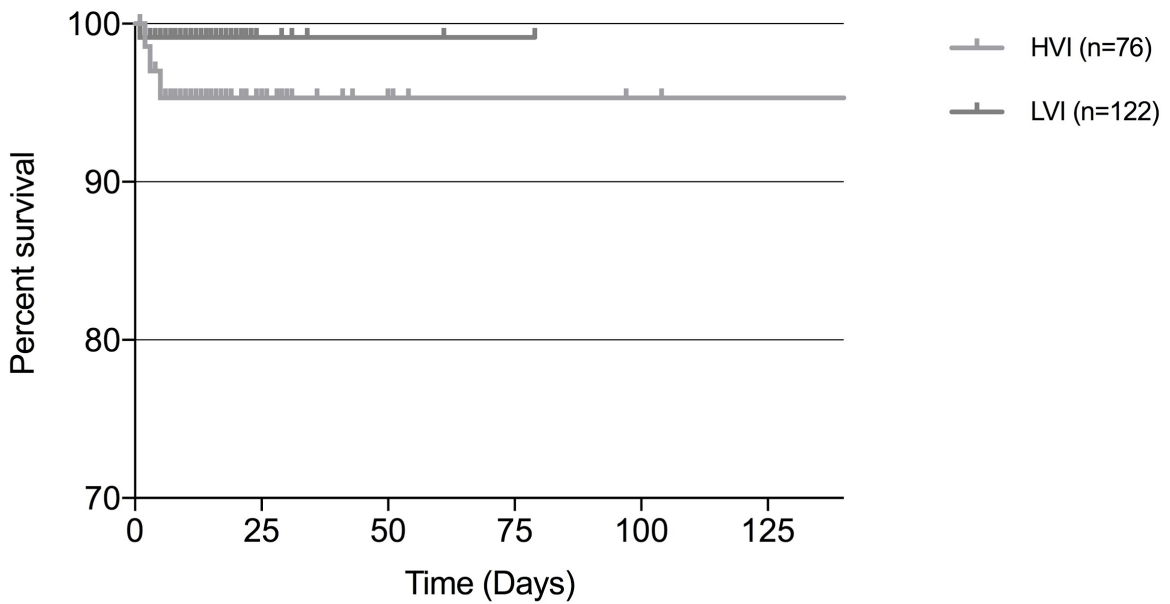

| No. at risk |     |    |   |   |   |   |
|-------------|-----|----|---|---|---|---|
| HVI:        | 76  | 18 | 7 | 3 | 2 | 1 |
| LVI:        | 117 | 5  | 2 | 1 | 0 | 0 |

**Supplementary Figure 4. Rates of psychiatric diagnoses among the long-term cohort.**

Abbreviations: HVI, high-voltage injury; LVI, low-voltage injury; PTSD, post-traumatic stress disorder; MDD, major depressive disorder; GAD, generalized anxiety disorder; AD, adjustment disorder; PD, panic disorder.

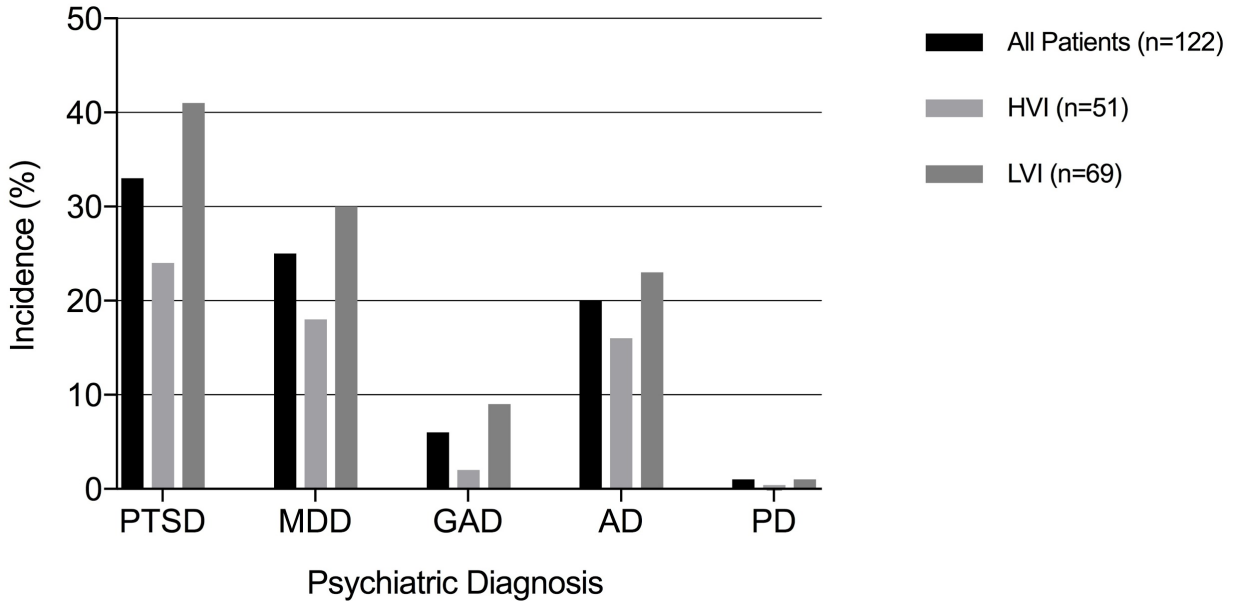

**Supplementary Table 1. Demographics and injury characteristics of patients treated acutely at the burn centre.**

|                            | All Patients <sup>a</sup> | HVI     | LVI      | <i>P</i> |
|----------------------------|---------------------------|---------|----------|----------|
| No. of patients            | 207                       | 76      | 122      |          |
| Age, years, mean (SD)      | 41 (13)                   | 40 (14) | 41 (13)  | 0.64     |
| Male, no. (%)              | 198 (96)                  | 72 (95) | 117 (96) | 0.74     |
| Inhalation injury, no. (%) | 4 (2)                     | 1 (1)   | 3 (2)    | >.99     |
| Work-Related, no. (%)      | 171 (83)                  | 57 (75) | 107 (88) | .03      |
| Classification, no. (%)    |                           |         |          |          |
| Contact                    | 67 (32)                   | 11 (14) | 18 (15)  | >.99     |
| Flash                      | 115 (56)                  | 10 (13) | 101 (83) | <.001    |
| Contact and Flash          | 15 (7)                    | 46 (61) | 3 (2)    | <.001    |
| Lightning                  | 4 (2)                     | 4 (5)   | 0 (0)    | .02      |
| Unspecified                | 6 (3)                     | 5 (7)   | 0 (0)    | .008     |

Abbreviations: HVI, high-voltage injury; LVI, low-voltage injury; TBSA, total body surface area.

<sup>a</sup> Includes patients whose voltage was not otherwise specified (n=9).

**Supplementary Table 2. Demographics and injury characteristics of the long-term cohort.**

|                                | All Patients <sup>a</sup> | HVI     | LVI     | <i>P</i> |
|--------------------------------|---------------------------|---------|---------|----------|
| No. of patients                | 122                       | 51      | 69      |          |
| Work-Related, no. (%)          | 111 (91)                  | 47 (92) | 62 (90) | >.99     |
| Available RTW data, no. (%)    | 90 (81)                   | 39 (83) | 49 (79) | .54      |
| Pre-Injury Occupation, no. (%) |                           |         |         |          |
| Electrician                    | 26 (29)                   | 6 (15)  | 19 (39) | .02      |
| Mechanic                       | 3 (3)                     | 0 (0)   | 3 (6)   | .25      |
| Maintenance Worker             | 4 (4)                     | 0 (0)   | 4 (8)   | .13      |
| Powerline Technician           | 13 (14)                   | 13 (33) | 0 (0)   | <.001    |
| Construction Worker            | 4 (4)                     | 4 (10)  | 0 (0)   | .04      |
| Self-Employed                  | 2 (2)                     | 2 (5)   | 0 (0)   | .19      |
| Truck Driver                   | 3 (3)                     | 3 (8)   | 0 (0)   | .08      |
| Other                          | 29 (32)                   | 8 (21)  | 21 (43) | .04      |
| Unknown                        | 6 (7)                     | 3 (8)   | 2 (4)   | .65      |

Abbreviations: HVI, high-voltage injury; LVI, low-voltage injury; RTW, return-to-work.  
 Analysis excludes patients with documented pre-existing psychiatric conditions.  
<sup>a</sup> Includes patients whose voltage was not otherwise specified (n=2).

**Supplementary Table 3. Time to diagnosis (from day of injury) of psychiatric conditions during the long-term period of treatment.**

|                                                             | All Patients   | HVI            | LVI            | <i>P</i> |
|-------------------------------------------------------------|----------------|----------------|----------------|----------|
| All Conditions (n=101), days, median (IQR) <sup>a,b</sup>   | 315 (117-957)  | 384 (161-1461) | 272 (114-904)  | .20      |
| PTSD (n=40), days, median (IQR)                             | 263 (78-937)   | 325 (153-1495) | 253 (75-843)   | .41      |
| MDD (n=30), days, median (IQR)                              | 531 (213-1061) | 684 (265-1897) | 402 (151-1013) | .33      |
| GAD (n=7), days, median (IQR)                               | 402 (261-1060) | -              | 374 (252-891)  | -        |
| Adjustment Disorder (n=23), days, median (IQR) <sup>b</sup> | 177 (88-771)   | 177 (63-1042)  | 177 (99-358)   | .82      |
| Panic Disorder (n=1), days, median (IQR)                    | -              | -              | -              | -        |

Abbreviations: HVI, high-voltage injury; LVI, low-voltage injury; PTSD, post-traumatic stress disorder; MDD, major depressive disorder; GAD, generalized anxiety disorder.  
 Analysis excludes patients with documented pre-existing psychiatric conditions.  
<sup>a</sup> Conditions include PTSD, MDD, GAD, adjustment disorder and panic disorder.  
<sup>b</sup> Patients without documented diagnoses dates were excluded from analysis (n=1).

**Supplementary Table 4. Rates of neuropsychological symptoms in patients formally diagnosed with a psychiatric condition in the long-term cohort.**

|                                            | <b>PTSD</b> | <b>MDD</b> | <b>GAD</b> | <b>Adjustment Disorder</b> | <b>Panic Disorder</b> |
|--------------------------------------------|-------------|------------|------------|----------------------------|-----------------------|
| No. of patients                            | 40          | 30         | 7          | 24                         | 1                     |
| Depressed Mood, no. (%)                    | 34 (85)     | 29 (97)    | 7 (100)    | 24 (100)                   | 1 (100)               |
| Anxiety, no. (%)                           | 38 (95)     | 28 (93)    | 7 (100)    | 21 (88)                    | 1 (100)               |
| Flashbacks, no. (%)                        | 23 (58)     | 13 (43)    | 2 (29)     | 13 (54)                    | 1 (100)               |
| Avoidance, no. (%)                         | 17 (43)     | 15 (50)    | 4 (57)     | 10 (42)                    | 1 (100)               |
| Hypervigilance, no. (%)                    | 8 (20)      | 9 (30)     | 1 (14)     | 2 (8)                      | 0 (0)                 |
| Hyperarousal, no. (%)                      | 13 (33)     | 8 (27)     | 1 (14)     | 5 (21)                     | 1 (100)               |
| Nightmares, no. (%)                        | 21 (53)     | 16 (53)    | 6 (86)     | 14 (58)                    | 0 (0)                 |
| Sleep Difficulties, no. (%)                | 37 (93)     | 28 (93)    | 7 (100)    | 22 (92)                    | 1 (100)               |
| Social Withdrawal, no. (%)                 | 10 (25)     | 8 (27)     | 2 (29)     | 4 (17)                     | 0 (0)                 |
| Suicidal Ideations, no. (%)                | 18 (45)     | 15 (50)    | 4 (57)     | 9 (38)                     | 1 (100)               |
| Memory/Concentration Difficulties, no. (%) | 33 (83)     | 29 (97)    | 7 (100)    | 21 (88)                    | 1 (100)               |
| Dizziness, no. (%)                         | 7 (18)      | 7 (23)     | 2 (29)     | 7 (29)                     | 0 (0)                 |
| Headaches, no. (%)                         | 19 (48)     | 15 (50)    | 4 (57)     | 17 (71)                    | 0 (0)                 |
| Phantom Limb Pain, no. (%)                 | 2 (5)       | 2 (7)      | 1 (14)     | 1 (4)                      | 0 (0)                 |
| Chronic Pain, no. (%)                      | 24 (60)     | 23 (77)    | 3 (43)     | 16 (67)                    | 0 (0)                 |

Abbreviations: PTSD, post-traumatic stress disorder; MDD, major depressive disorder; GAD, generalized anxiety disorder.  
 Analysis excludes patients with documented pre-existing psychiatric conditions.
